# Supplementary material for: A new CaCO3-template method to synthesize nanoporous manganese oxide hollow structures and their transformation to high-performance LiMn2O4 cathodes for lithium-ion batteries
Source: Royal Society of Chemistry journal article supplement (doi:10.1039/c3ta11066d), 2013-01-01
Supplement: c3ta11066d.pdf [file c3ta11066d.pdf]

**Electronic Supplementary information for**  
**A new CaCO<sub>3</sub>-template method to synthesize nanoporous manganese oxides**  
**hollow structures and their transformation to high-performance LiMn<sub>2</sub>O<sub>4</sub>**  
**cathode for Lithium-ion batteries**

By Chunyu Zhu, Genki Saito, Tomohiro Akiyama\*

[\*] Prof. T. Akiyama, Dr. C. Zhu, Mr. G. Saito  
Center for Advanced Research of Energy & Materials, Hokkaido  
University, Sapporo 060-8628, Japan.  
E-mail: [takiyama@eng.hokudai.ac.jp](mailto:takiyama@eng.hokudai.ac.jp) (Tomohiro Akiyama)

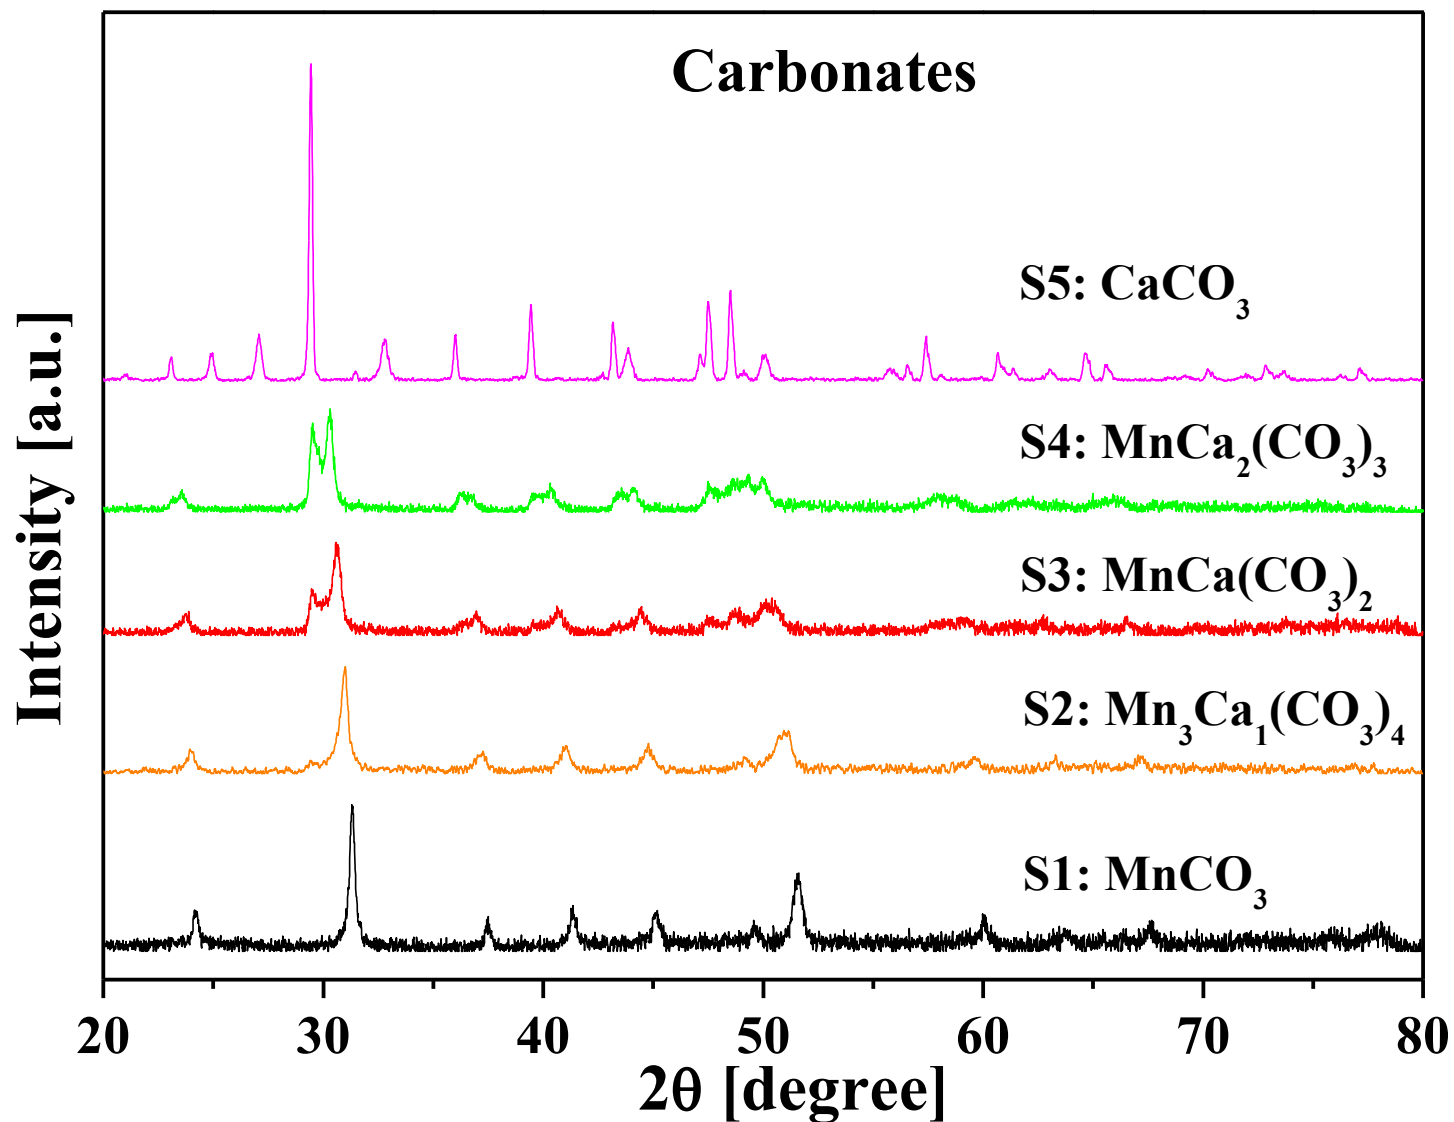

**Figure S1. XRD patterns for the coprecipitated carbonates.**

## **Figure S2. SEM images and EDS analysis for the as-prepared carbonates.**

**(a). S1,  $\text{MnCO}_3$ ;**

**(b). S2,  $\text{Mn}_3\text{Ca}_1(\text{CO}_3)_4$ ;**

**(c). S3,  $\text{Mn}_1\text{Ca}_1(\text{CO}_3)_2$ ;**

**(d). S4,  $\text{Mn}_1\text{Ca}_2(\text{CO}_3)_3$ .**

**(e). S5,  $\text{CaCO}_3$**

# Figure S2-(a)

## S1, 1:0, MnCO<sub>3</sub>

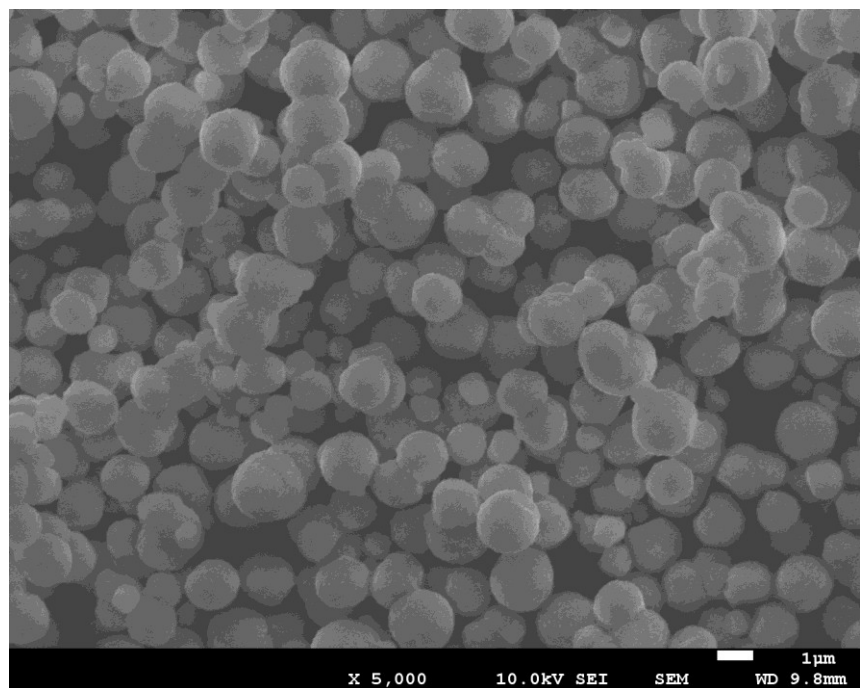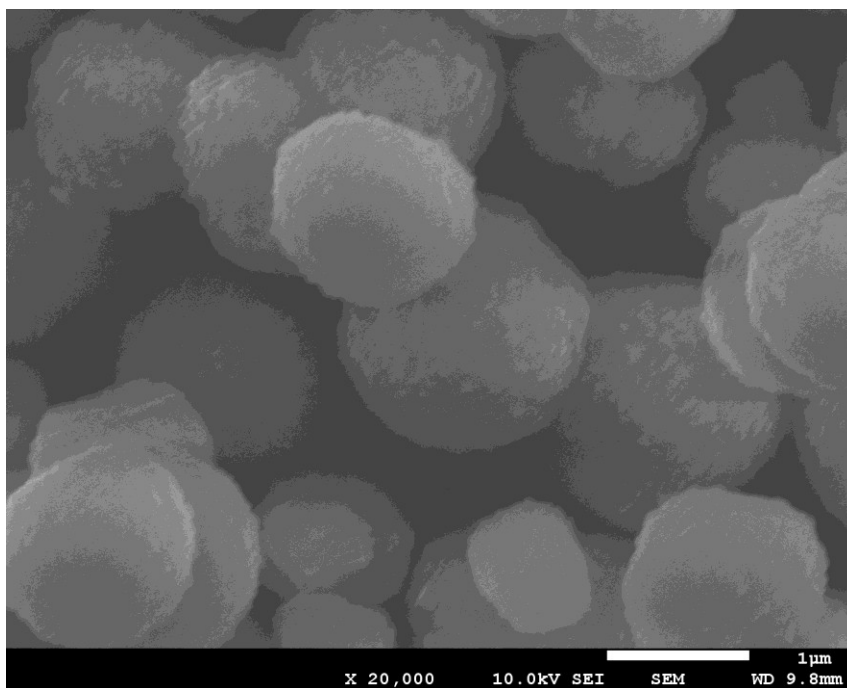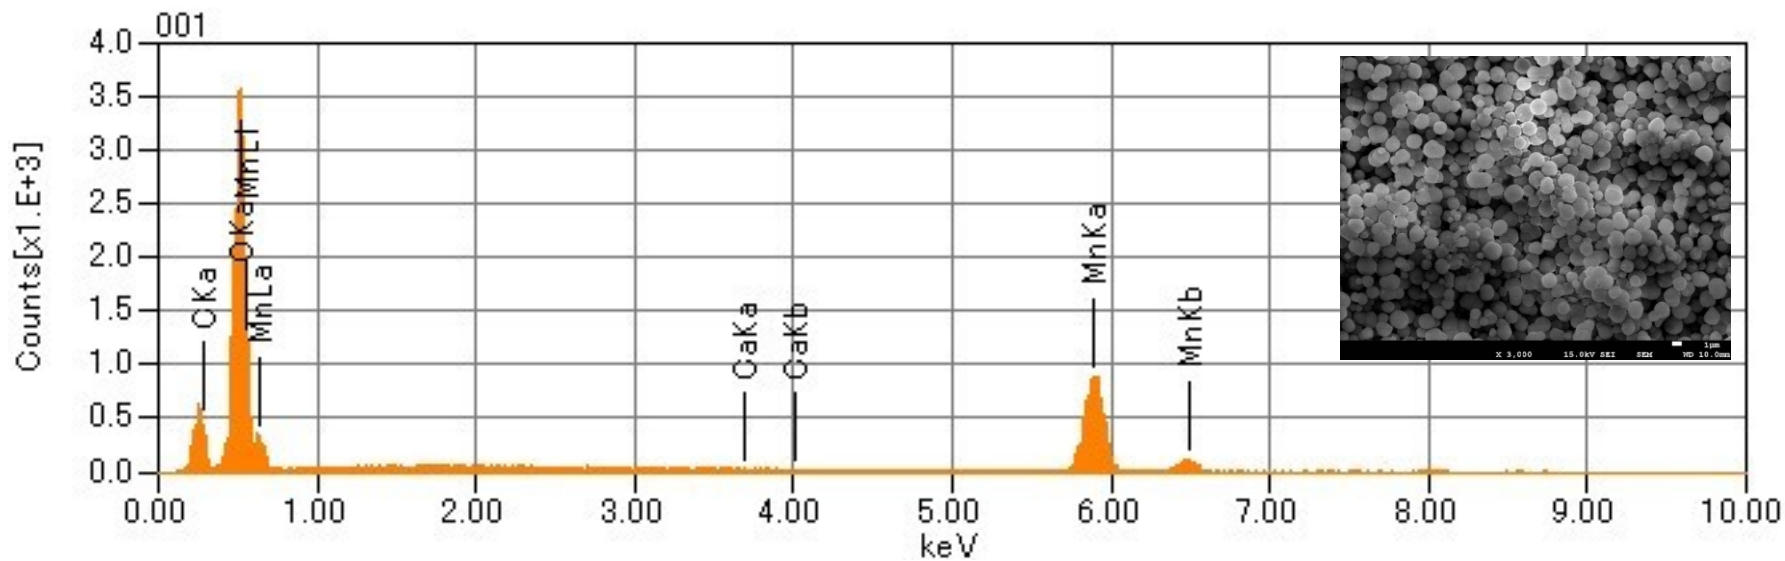



**Figure S2-(b)**

**S2, 3:1,  $\text{Mn}_3\text{Ca}_1(\text{CO}_3)_4$**

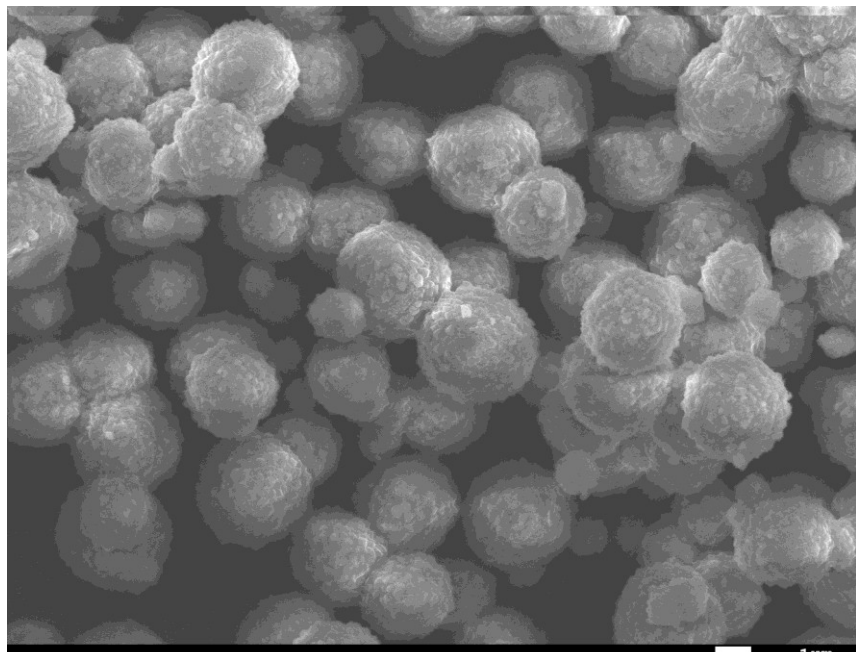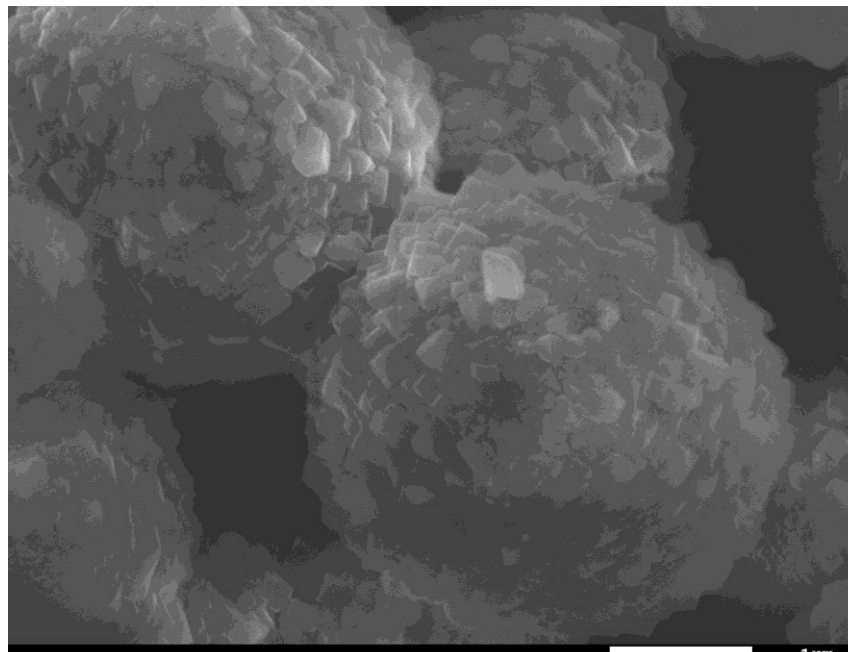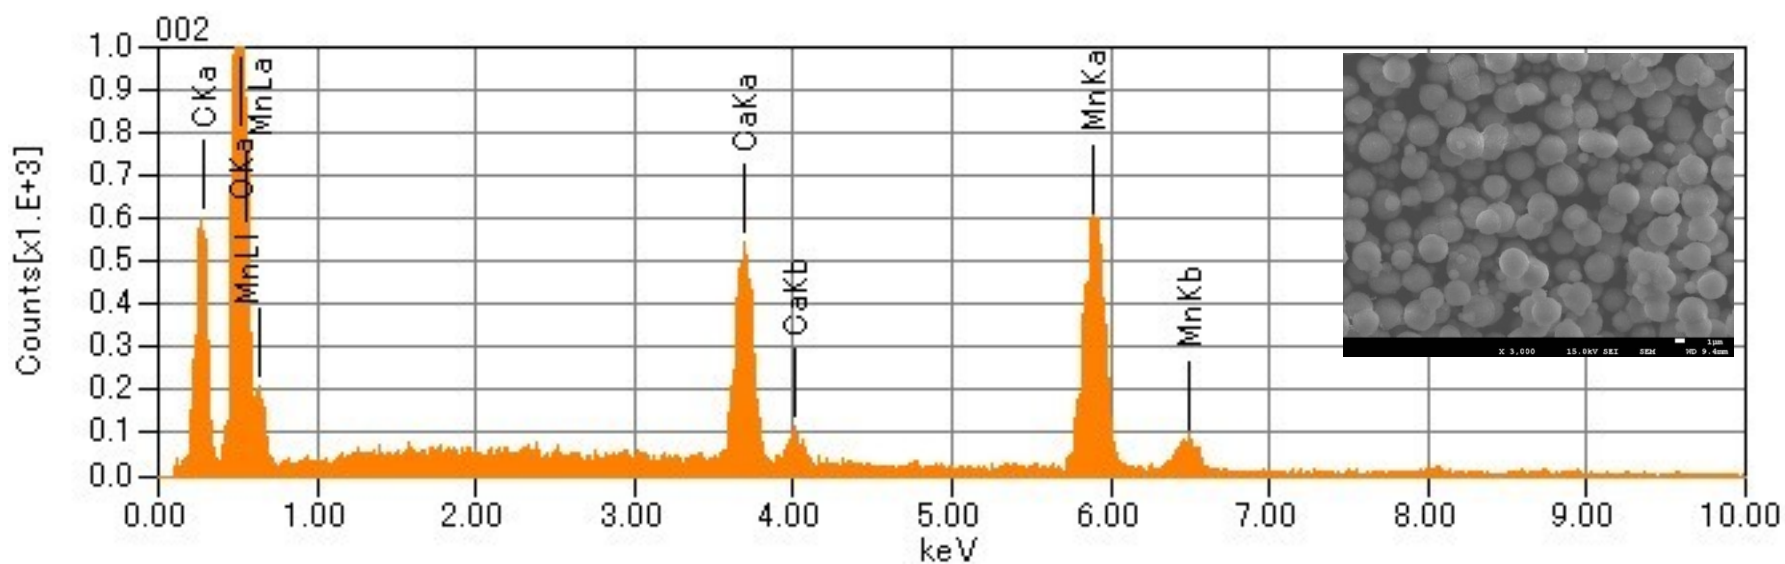

# Figure S2-(c)

# S3, 1:1, $\text{Mn}_1\text{Ca}_1(\text{CO}_3)_2$

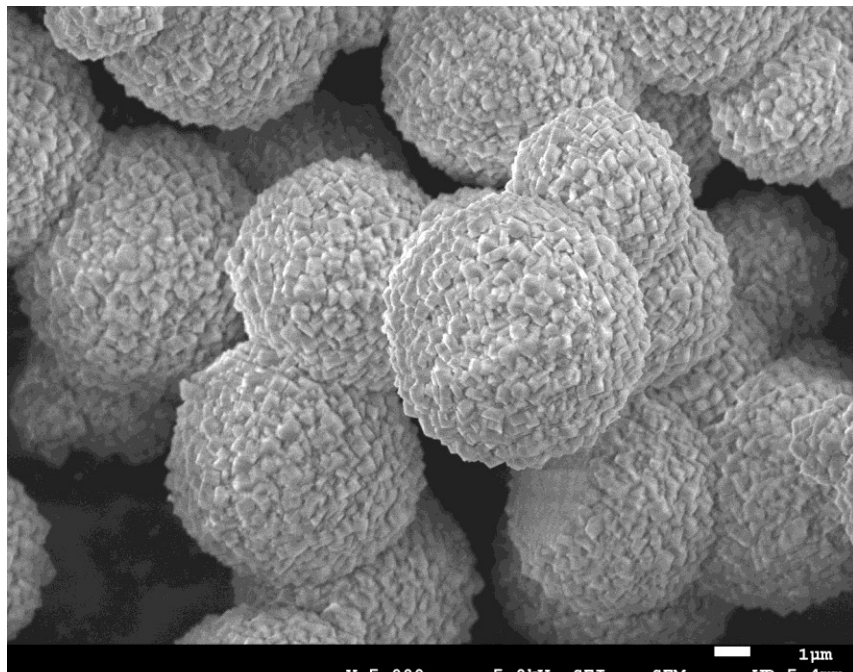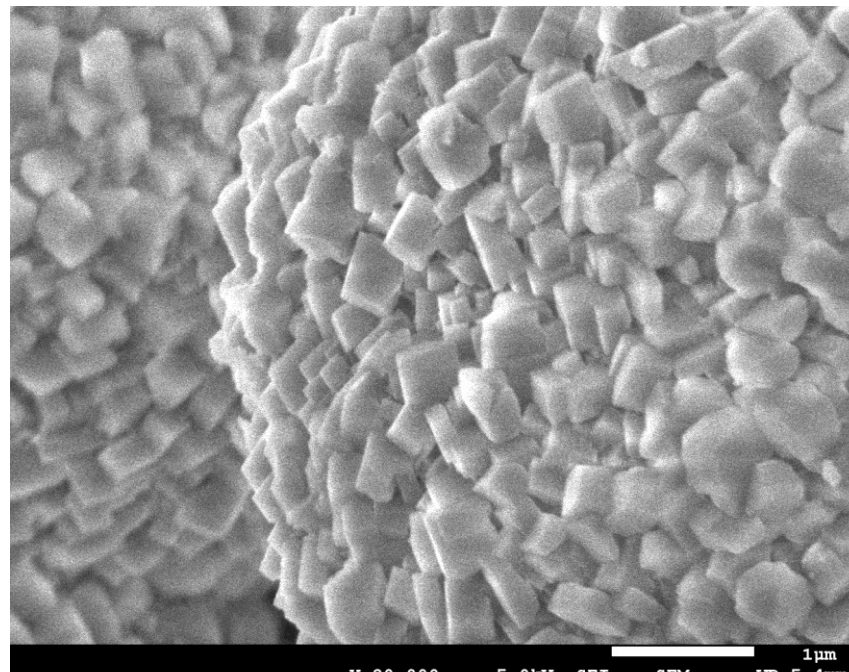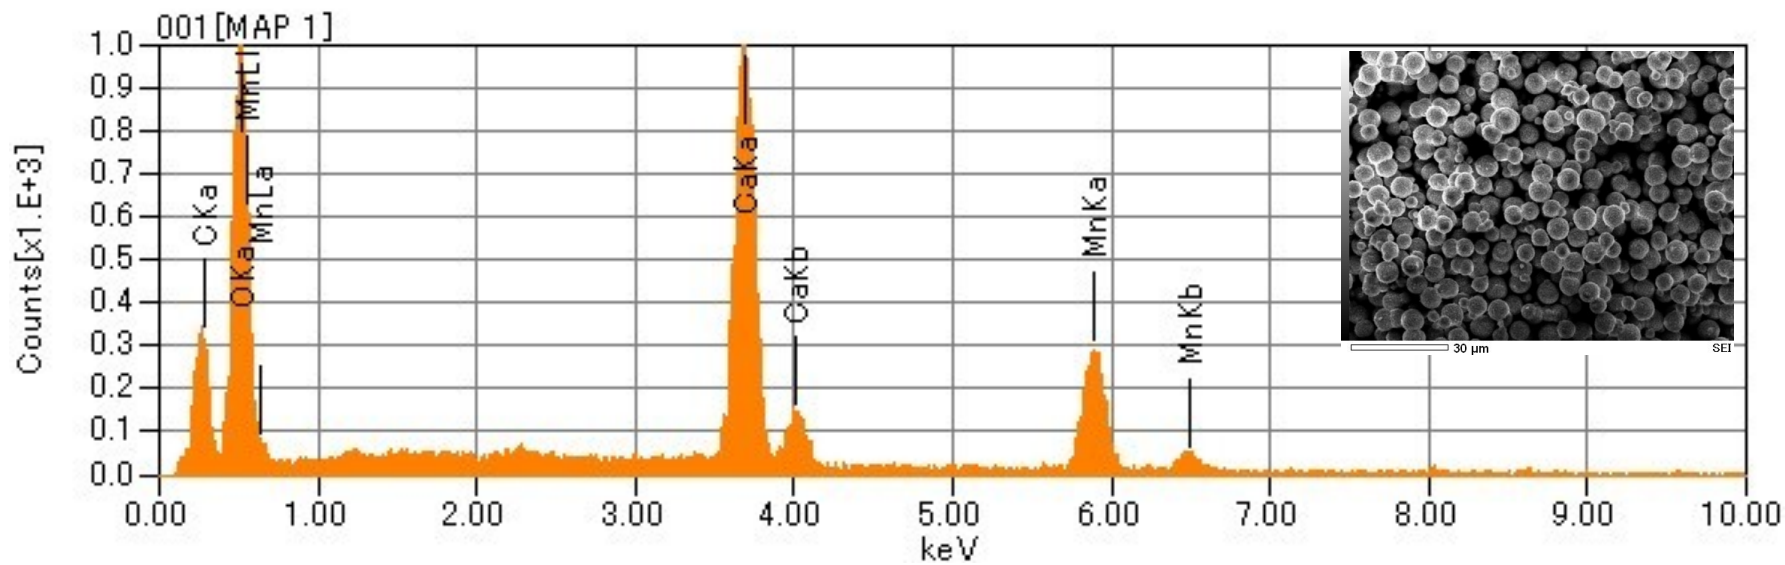



# Figure S2-(d)

## S4, 1:2, $\text{Mn}_1\text{Ca}_2(\text{CO}_3)_3$

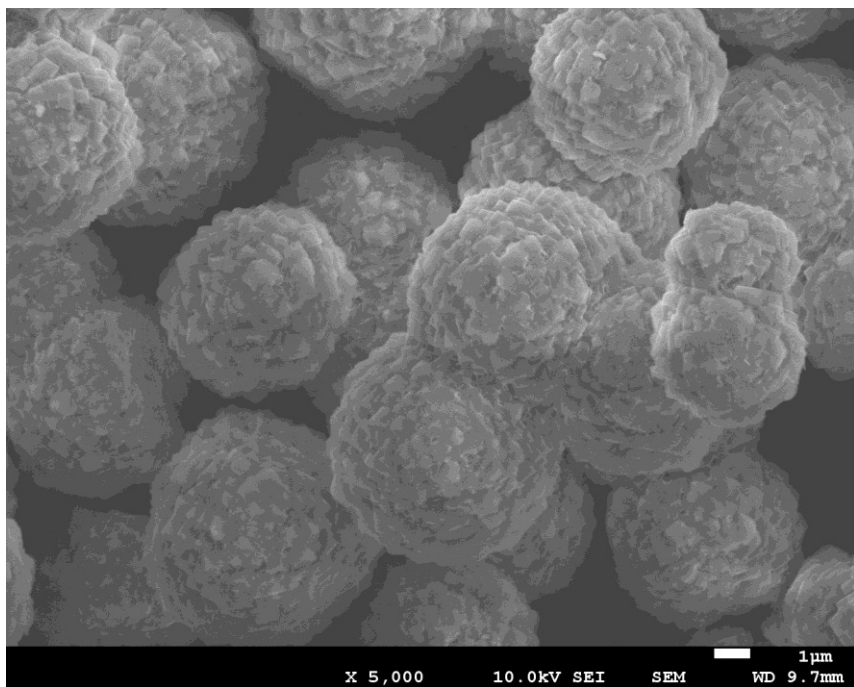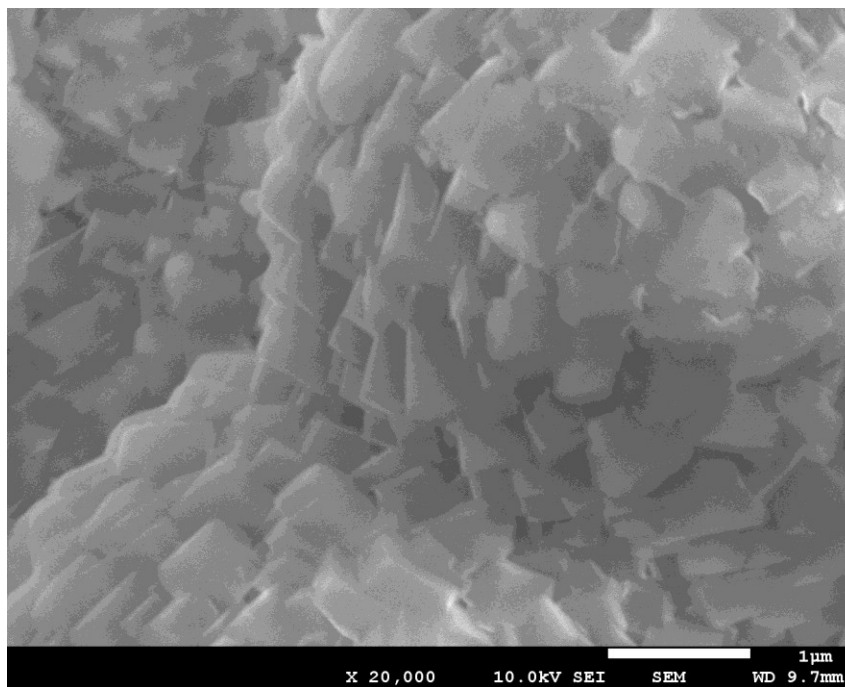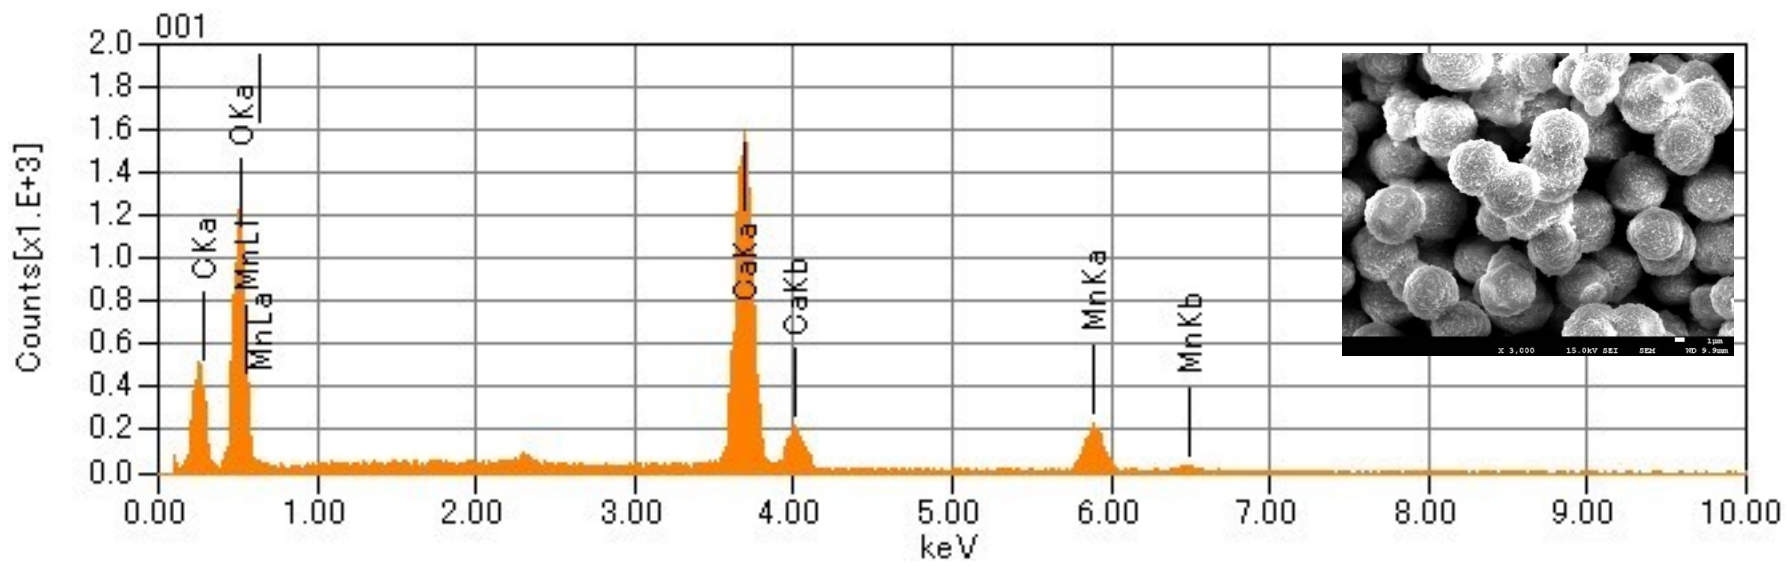

# Figure S2-(e)

## S5, CaCO<sub>3</sub>

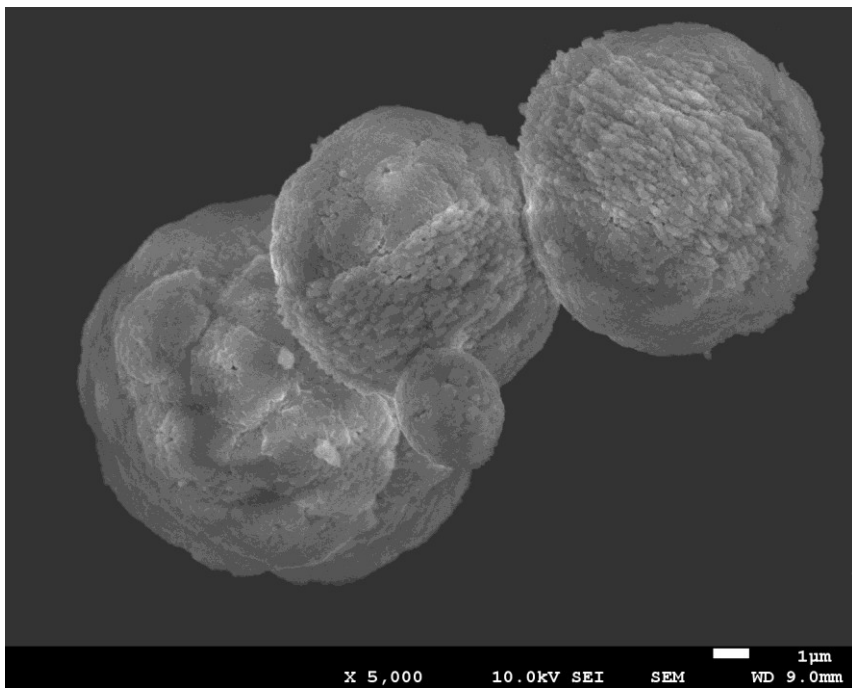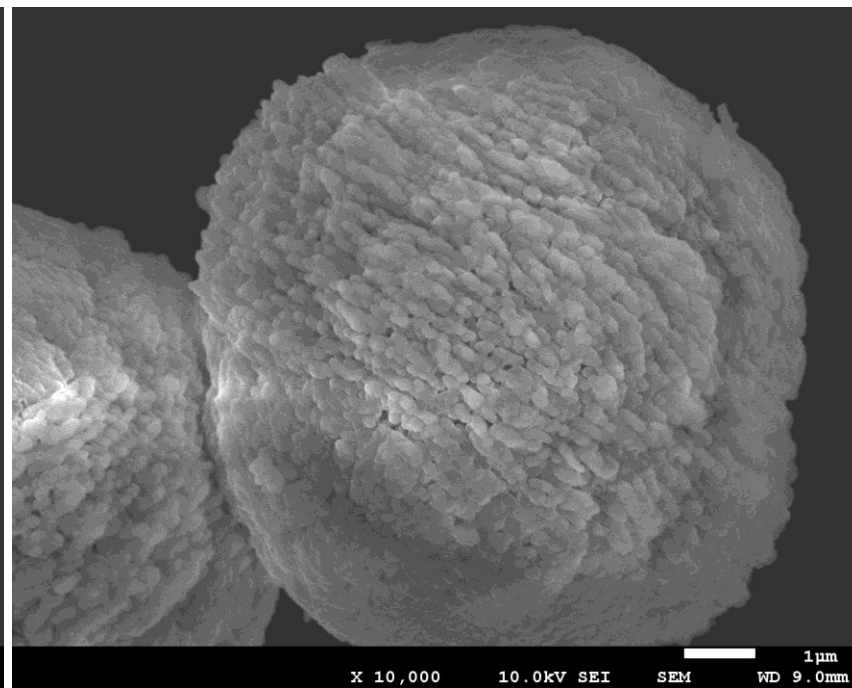

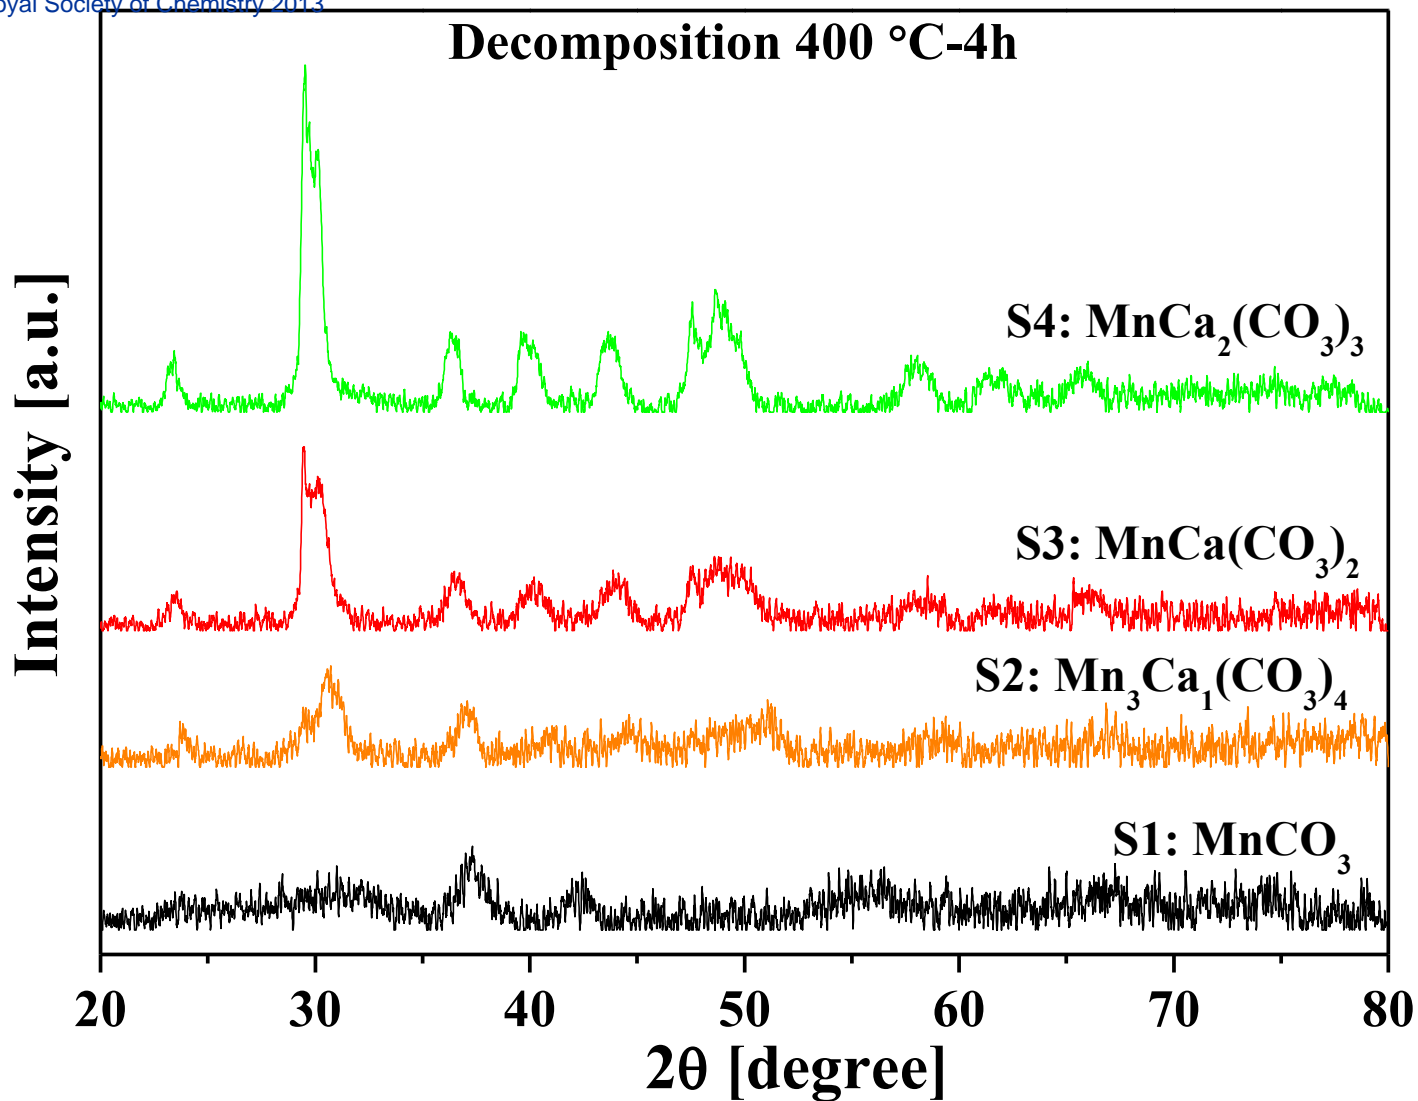

**Figure S3. XRD patterns for the carbonates after thermal decomposition at 400 °C for 4 h.**

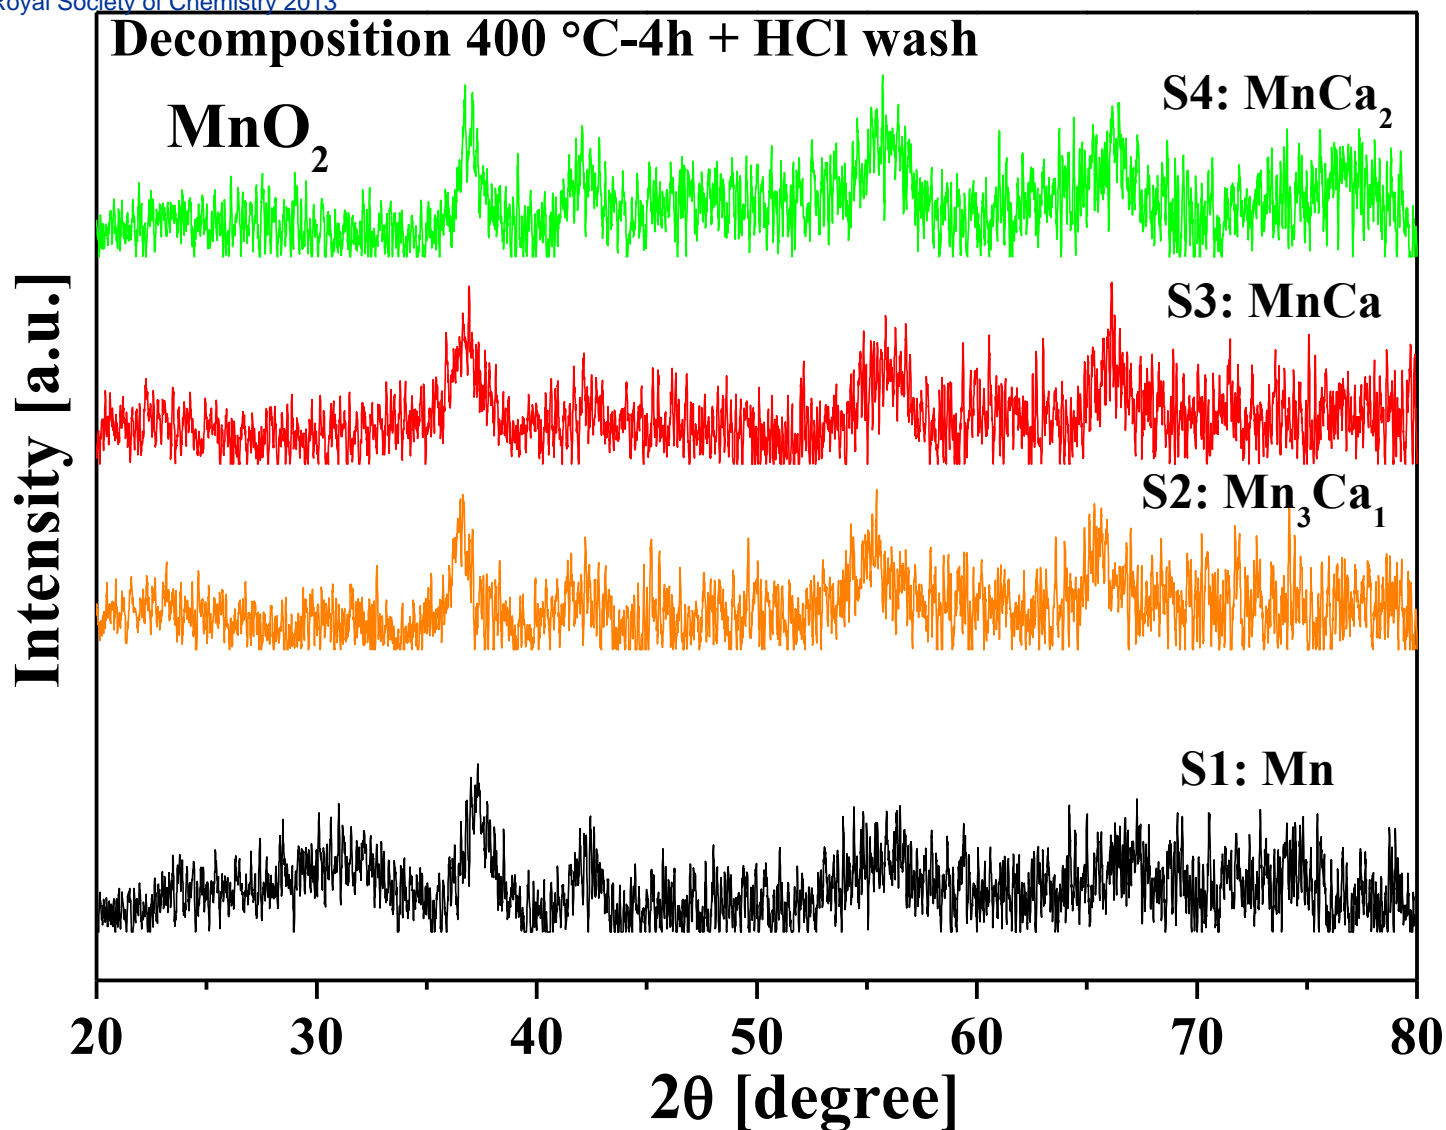

**Figure S4. XRD patterns for the carbonates after the treatment of thermal decomposition at 400 °C for 4 h and HCl wash.**

**Figure S5. SEM images for the carbonates after thermal decomposition at 400 °C for 4 h and HCl wash.**

**(a). S1, from  $\text{MnCO}_3$ , no HCl wash;**

**(b). S2, from  $\text{Mn}_3\text{Ca}_1(\text{CO}_3)_4$ ;**

**(c). S3, from  $\text{Mn}_1\text{Ca}_1(\text{CO}_3)_2$ ;**

**(d). S4, from  $\text{Mn}_1\text{Ca}_2(\text{CO}_3)_3$ .**



# Figure S5-(a)

## S1, from $\text{MnCO}_3$ , 400 °C-4h

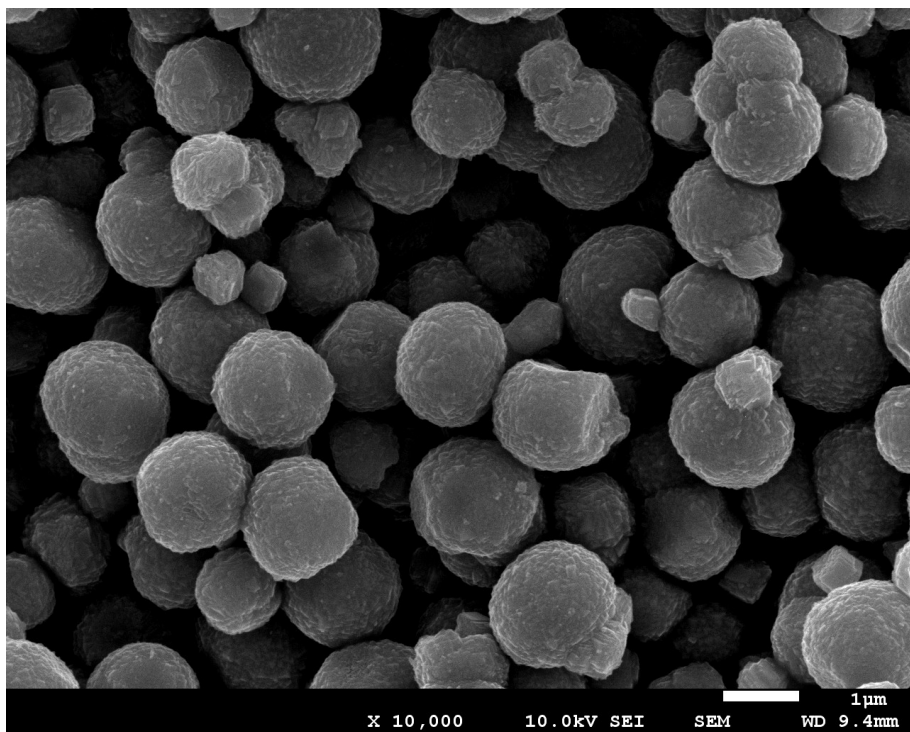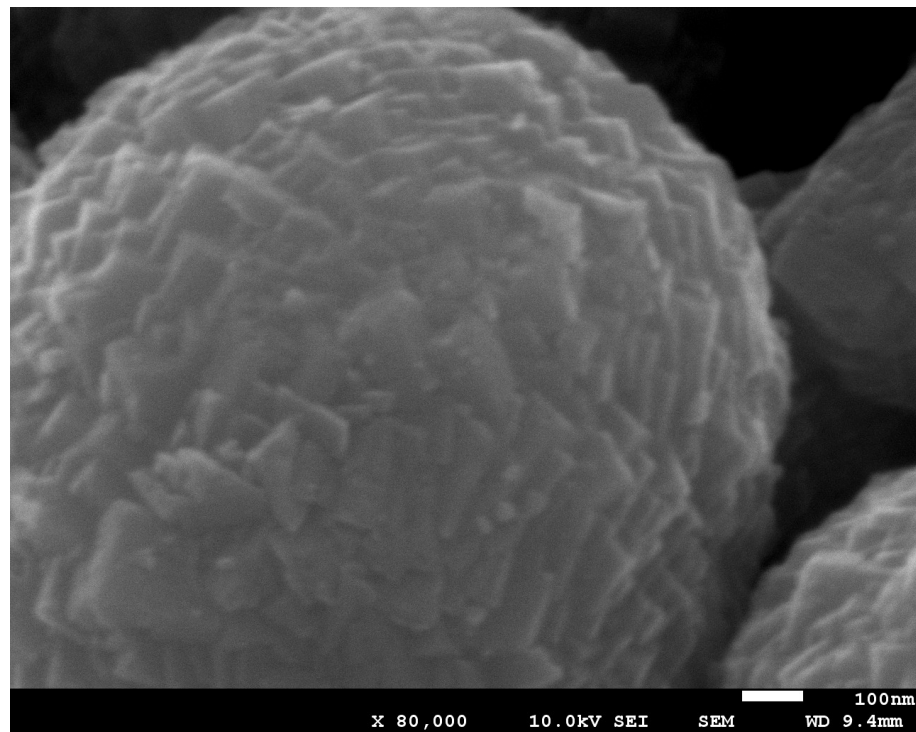



# Figure S5-(b) S2, from $\text{Mn}_3\text{Ca}_1(\text{CO}_3)_4$ , 400 °C-4h, HCl wash

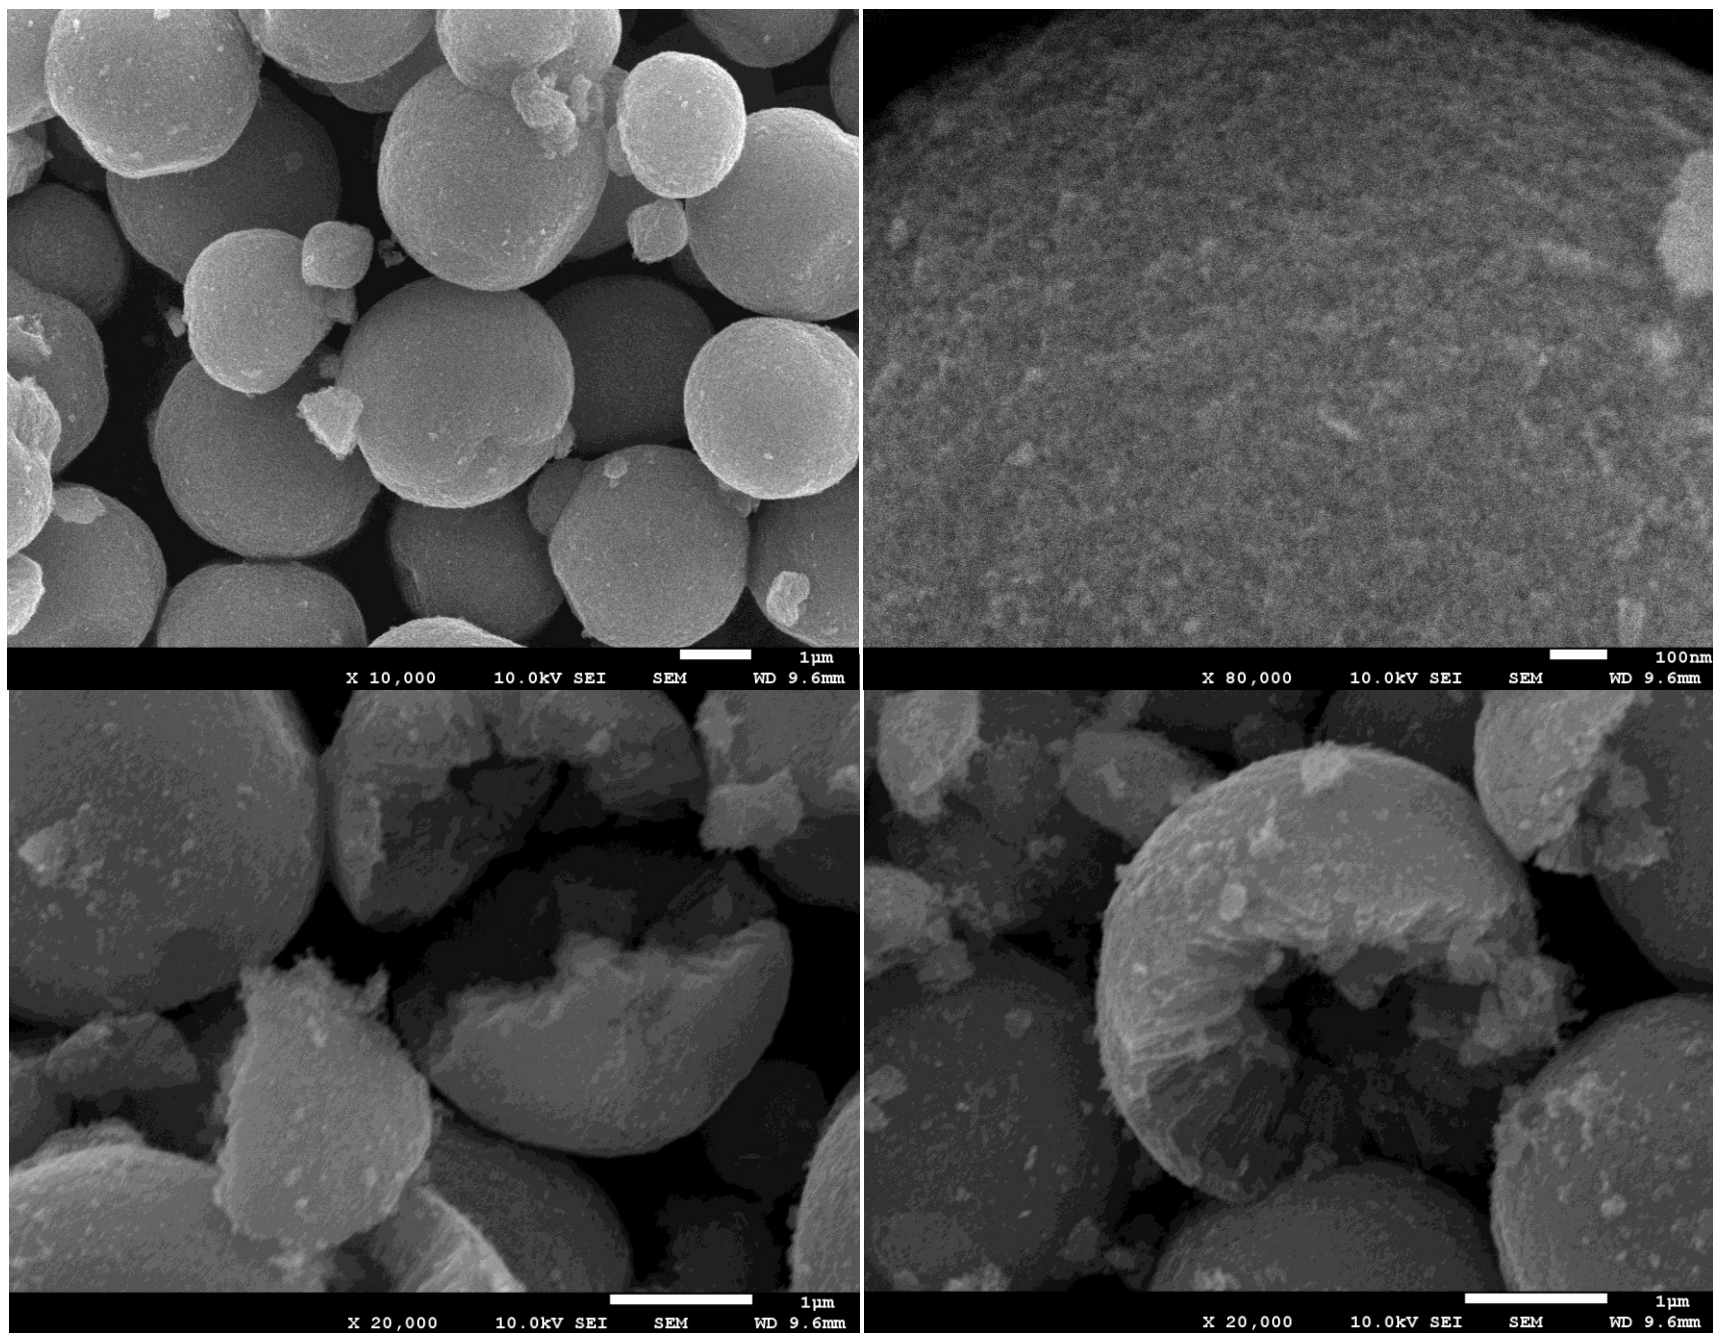

## Figure S5-(c)

**S3, from  $\text{Mn}_1\text{Ca}_1(\text{CO}_3)_2$ , 400 °C-4h, HCl wash**

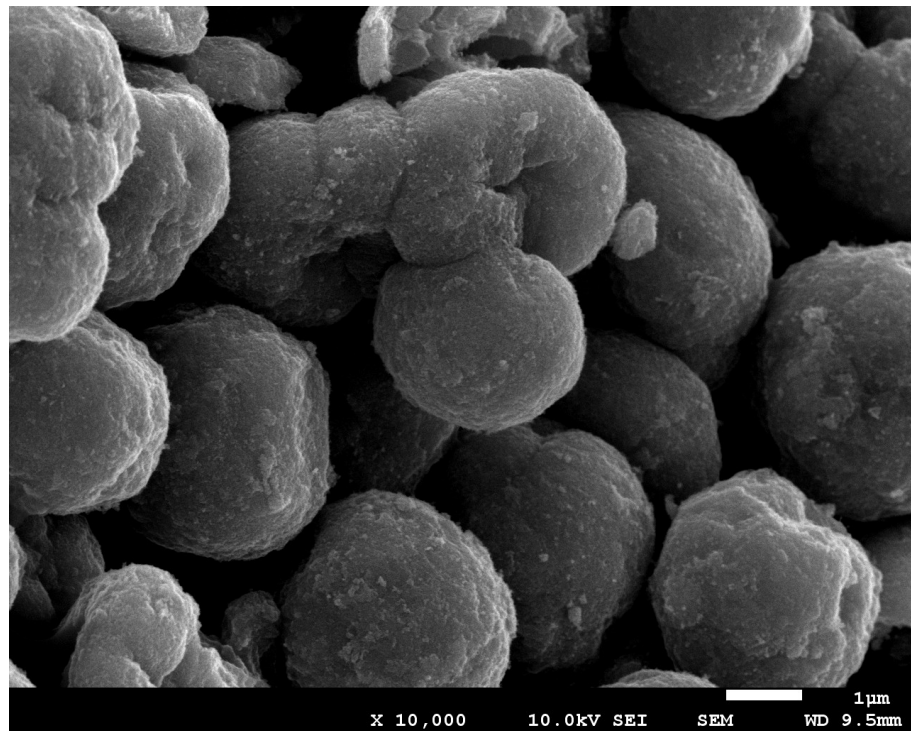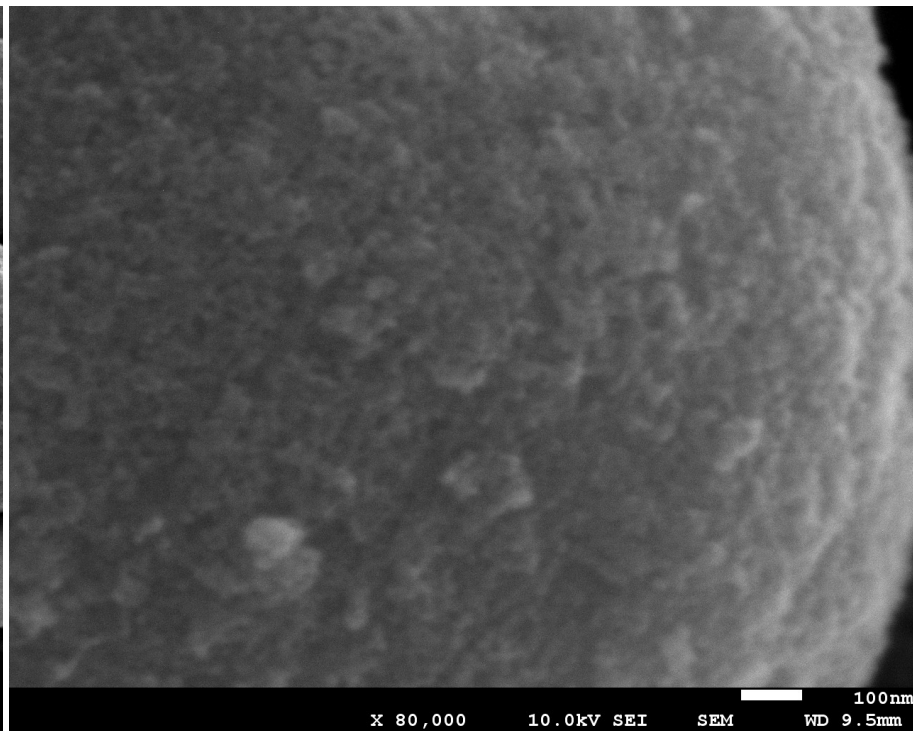



## Figure S5-(d)

**S4, from  $\text{Mn}_1\text{Ca}_2(\text{CO}_3)_3$ , 400 °C-4h, HCl wash**

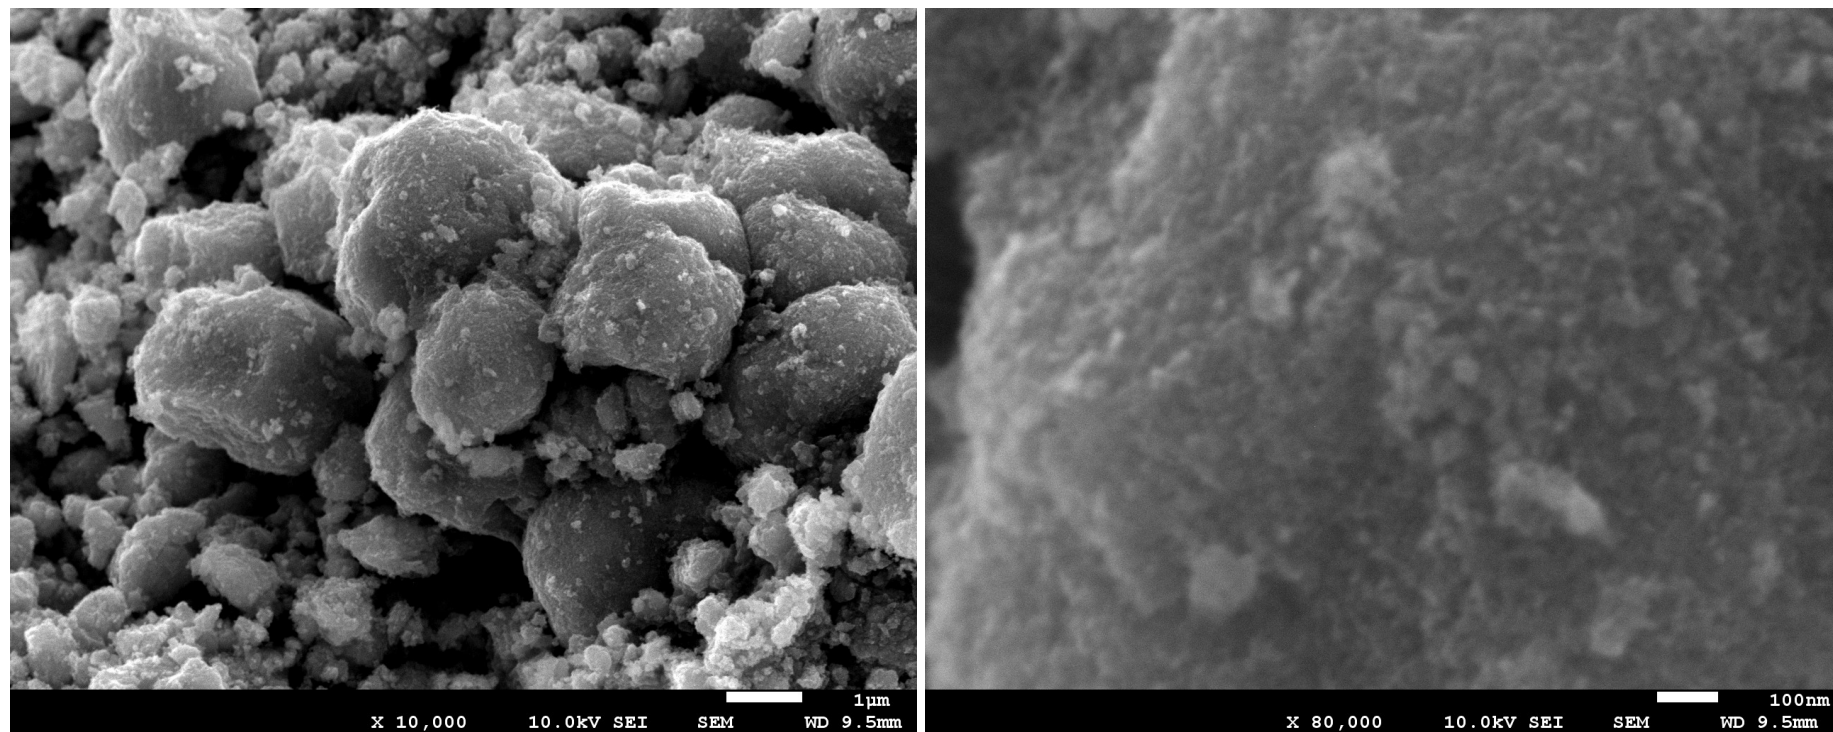

## S2, from $\text{Mn}_3\text{Ca}_1(\text{CO}_3)_4$ , 400 °C-4h, HCl wash

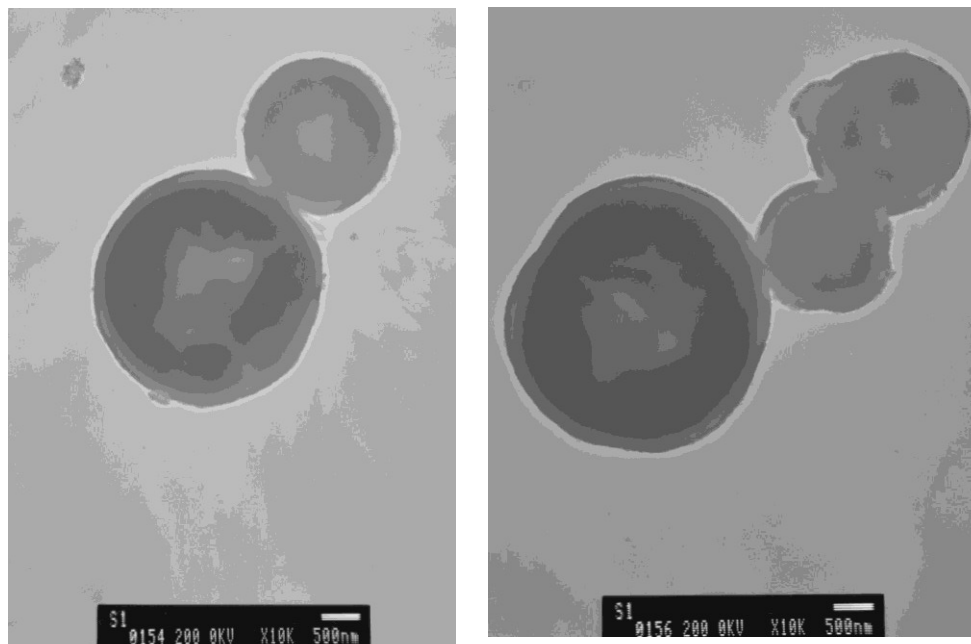

**Figure 6. TEM images for the carbonate of  $\text{Mn}_3\text{Ca}_1(\text{CO}_3)_4$  after thermal decomposition at 400 °C for 4 h and HCl wash.**

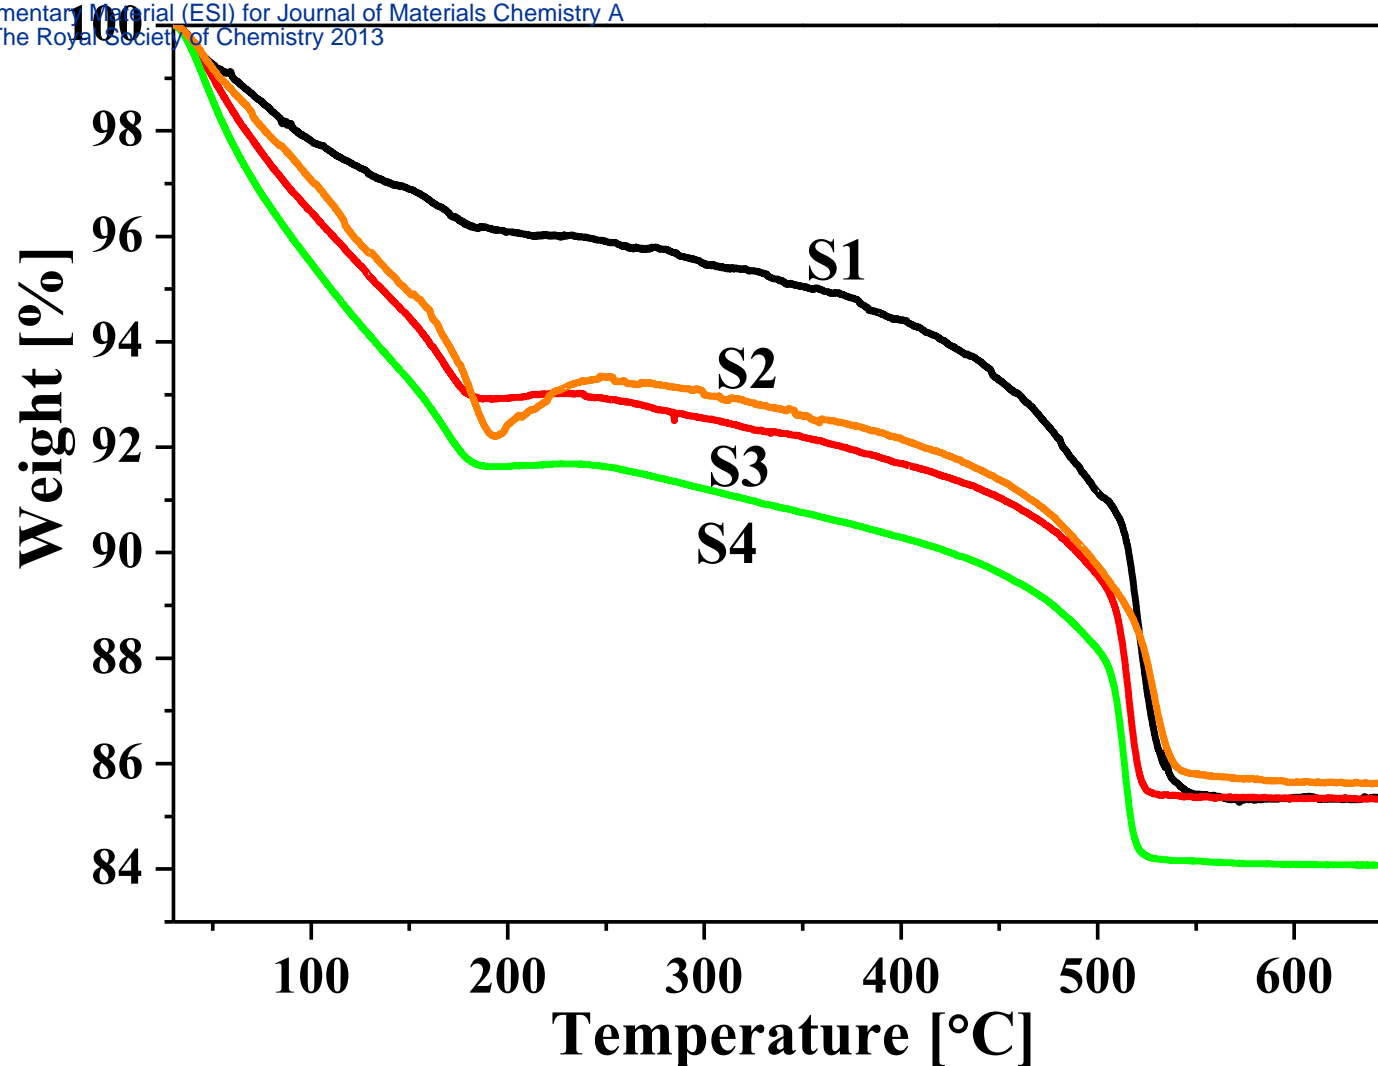

**Figure 7. TGA curves for the four samples after thermal decomposition at 400 °C for 4 h and HCl wash. (a). S1, from  $\text{MnCO}_3$ , no HCl wash was used; (b). S2, from  $\text{Mn}_3\text{Ca}_1(\text{CO}_3)_4$ ; (c). S3, from  $\text{Mn}_1\text{Ca}_1(\text{CO}_3)_2$ ; (d). S4, from  $\text{Mn}_1\text{Ca}_2(\text{CO}_3)_3$ . The analysis were carried out under ambient atmosphere at a heating rate of 5 °C/min.**

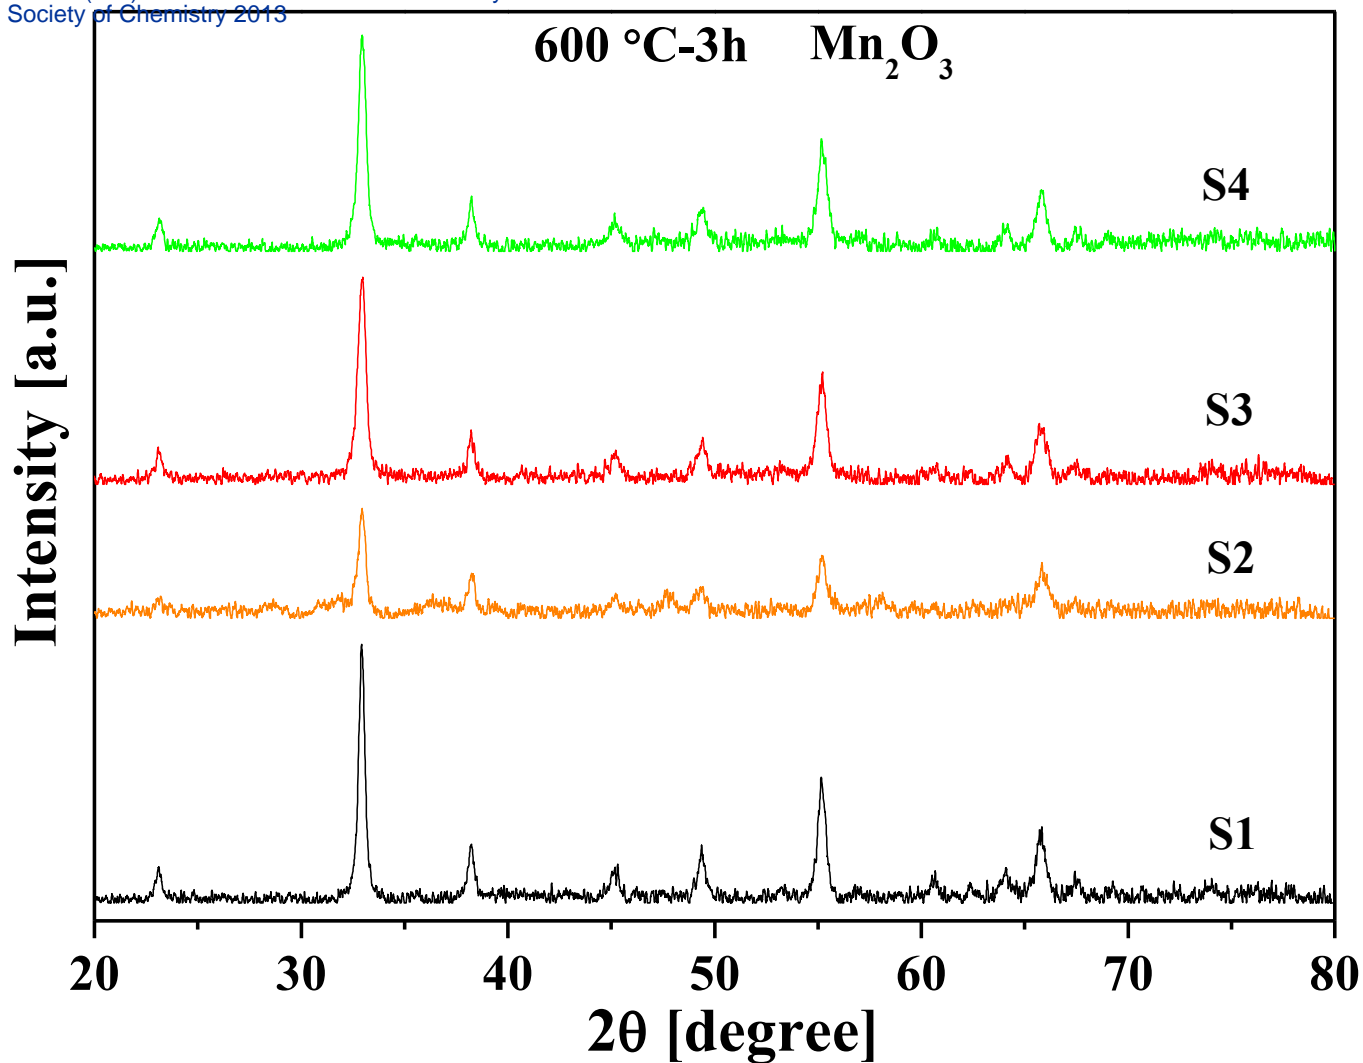

**Figure S8.** XRD patterns for the carbonates after a series of treatment of thermal decomposition at 400 °C for 4 h, HCl wash, and thermal decomposition at 600 °C for 3 h. S1 was obtained by directly decomposition at 600 °C for 3 h.

**Figure S9. SEM images for the carbonates after a series of treatment of thermal decomposition at 400 °C for 4 h, HCl wash, and thermal decomposition at 600 °C for 3 h.**

- (a). S1, from  $\text{MnCO}_3$ , directly decomposed at 600 °C for 3 h;**
- (b). S2, from  $\text{Mn}_3\text{Ca}_1(\text{CO}_3)_4$ ;**
- (c). S3, from  $\text{Mn}_1\text{Ca}_1(\text{CO}_3)_2$ ;**
- (d). S4, from  $\text{Mn}_1\text{Ca}_2(\text{CO}_3)_3$ .**

# Figure S9-(a)

S1, from  $\text{MnCO}_3$ , 600 °C-3h

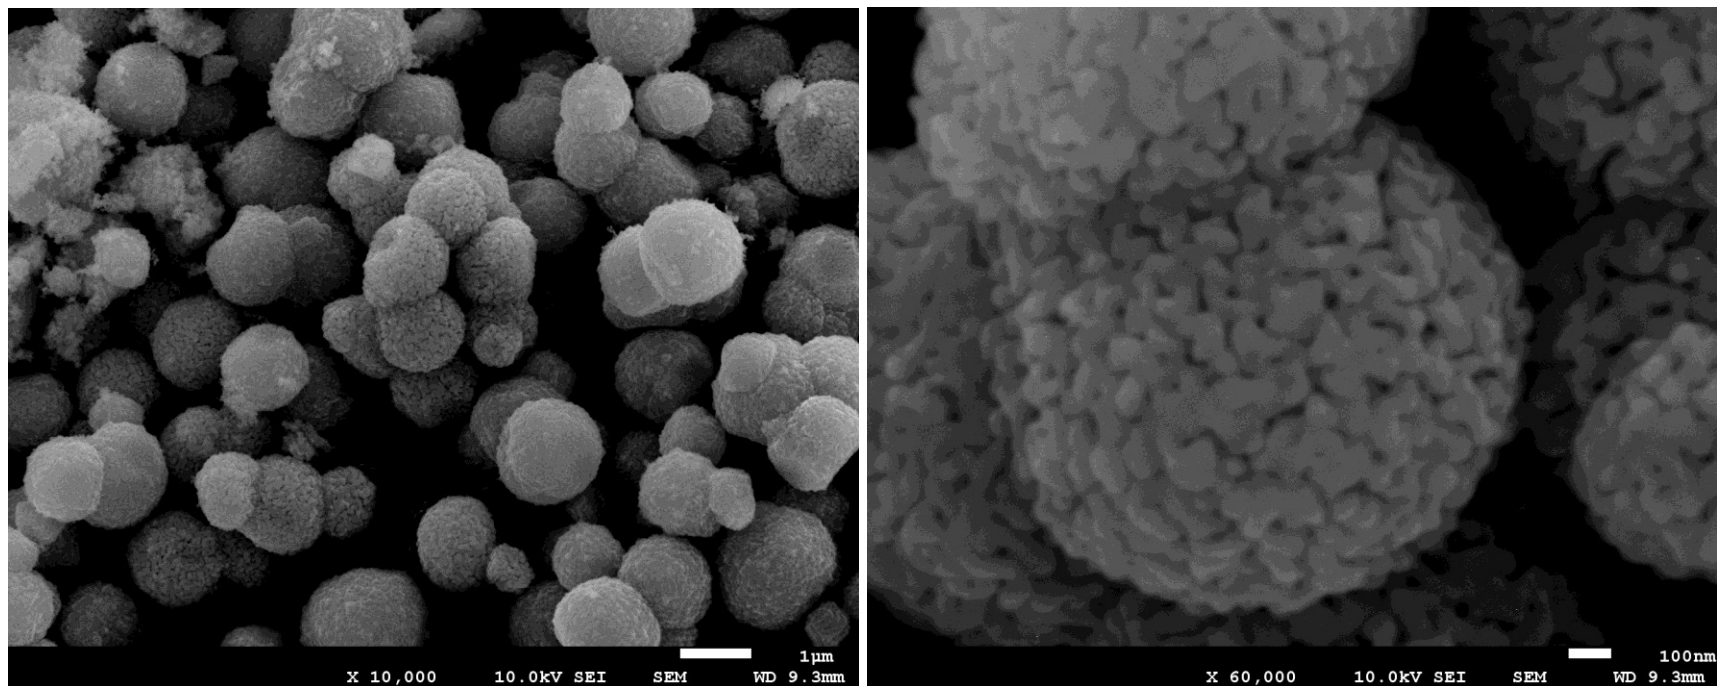



**Figure S9-(b)**

**S2, from  $Mn_3Ca_1(CO_3)_4$ , 400 °C-4h, HCl wash,  
600 °C-3h**

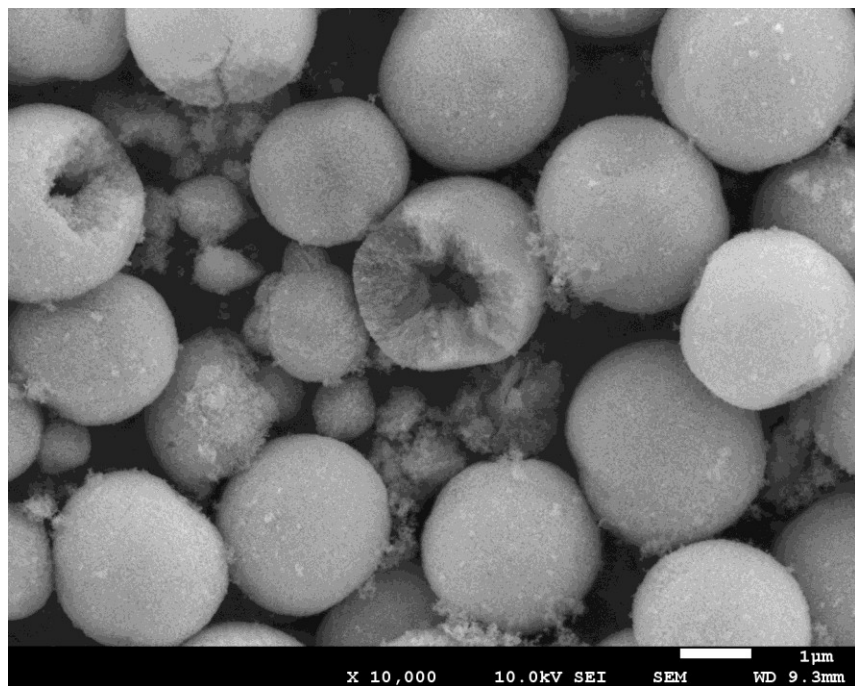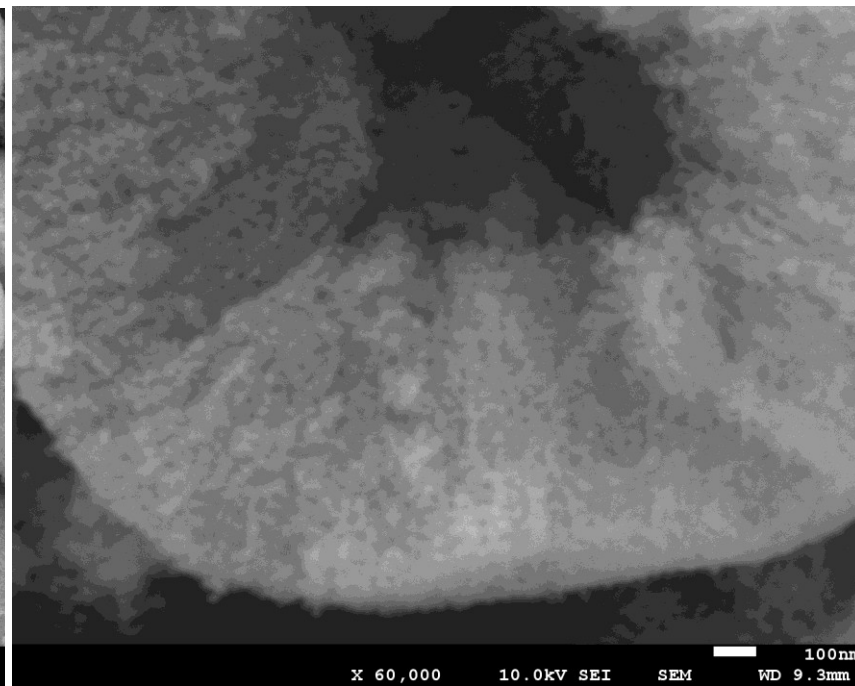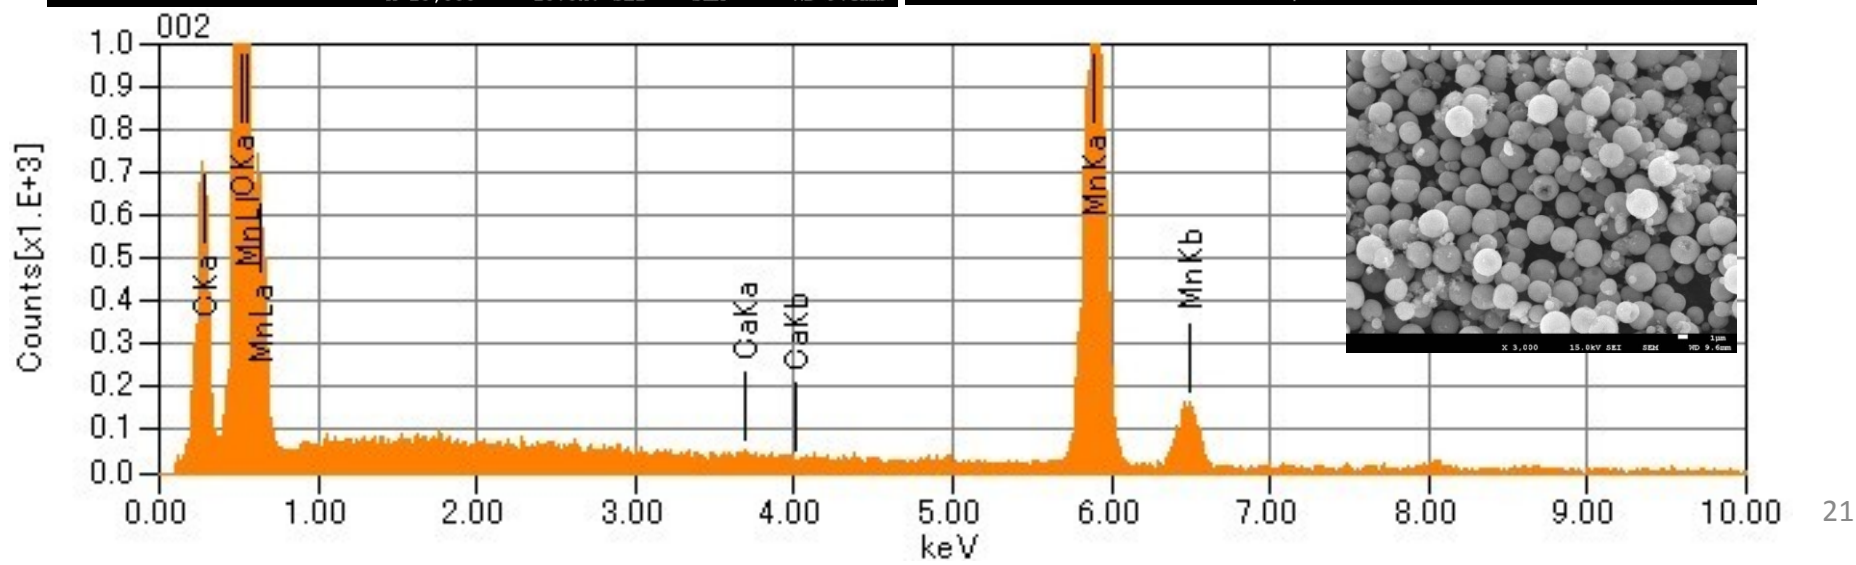

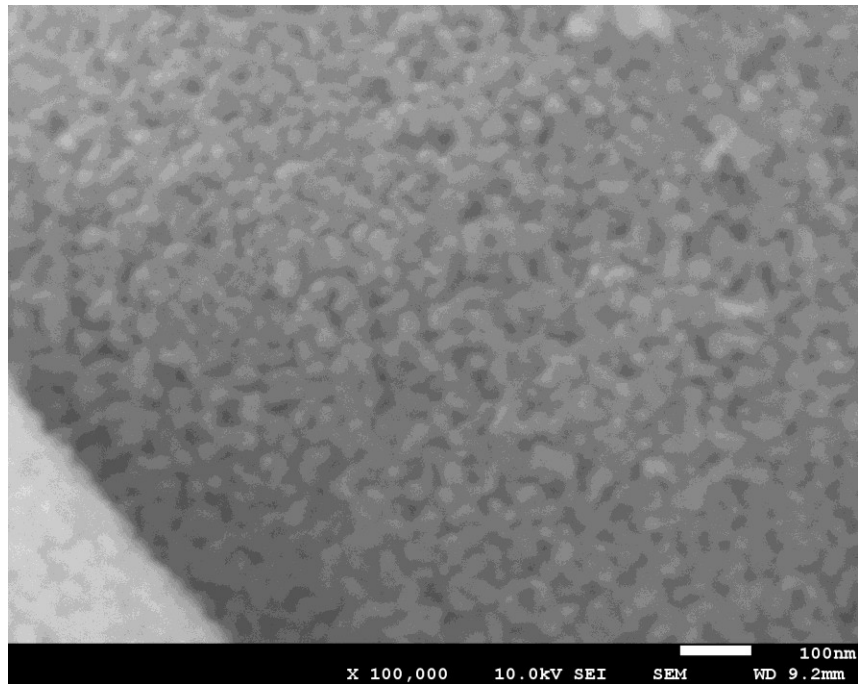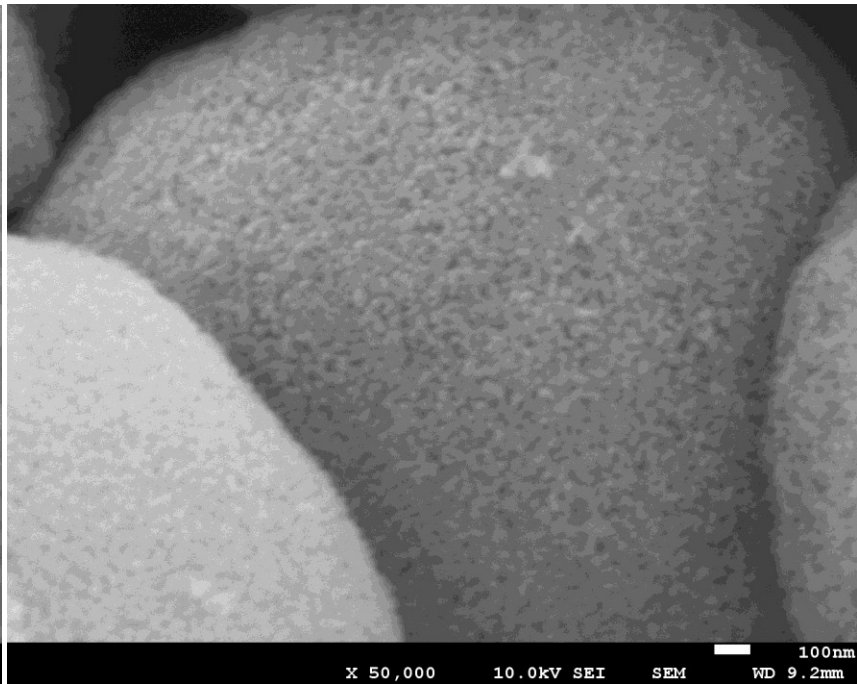



# Figure S9-(c) S3, from $\text{Mn}_1\text{Ca}_1(\text{CO}_3)_2$ , 400 °C-4h, HCl wash, 600 °C-3h

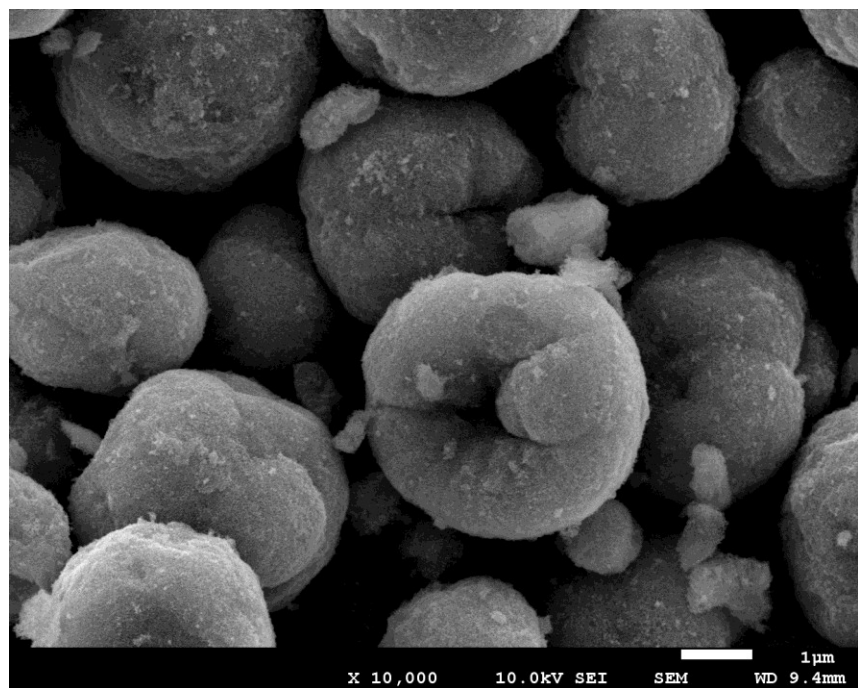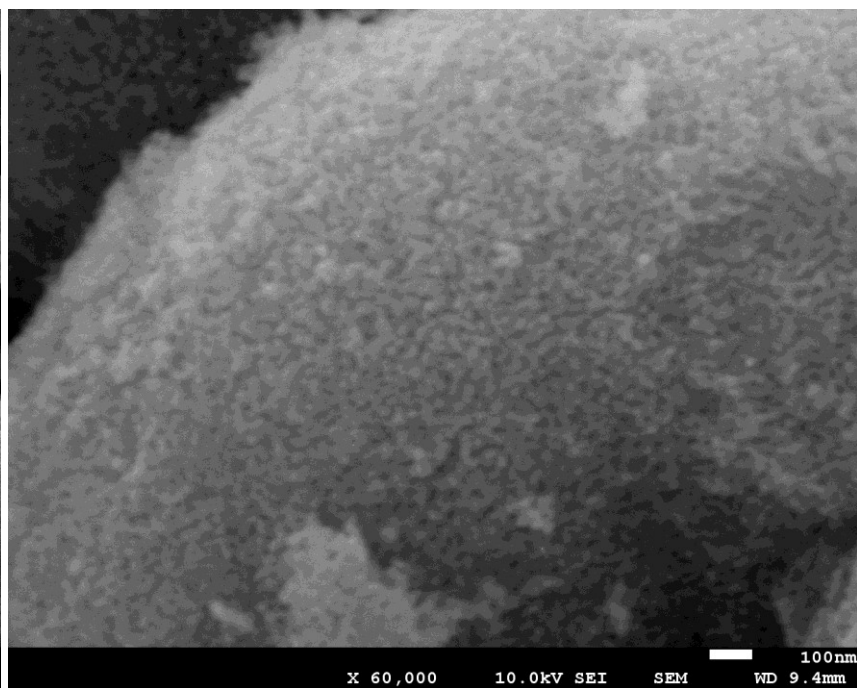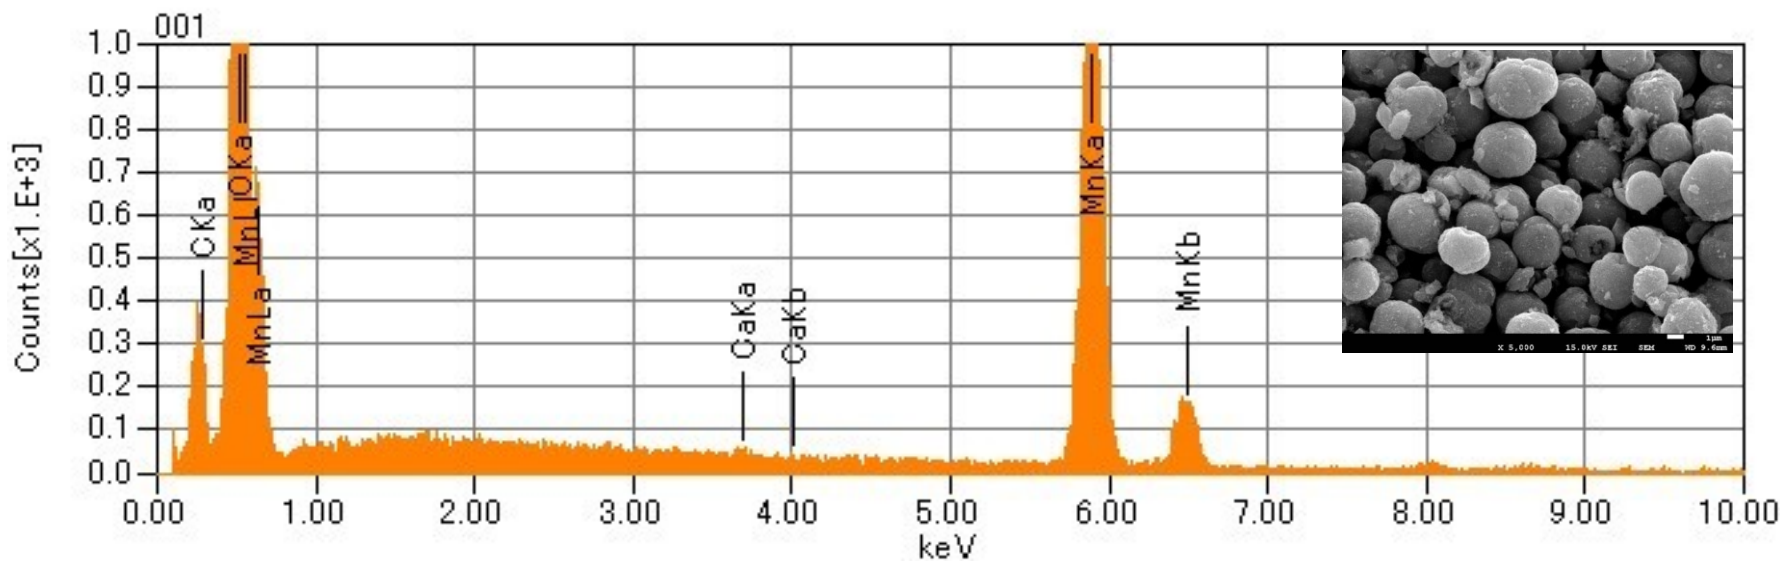

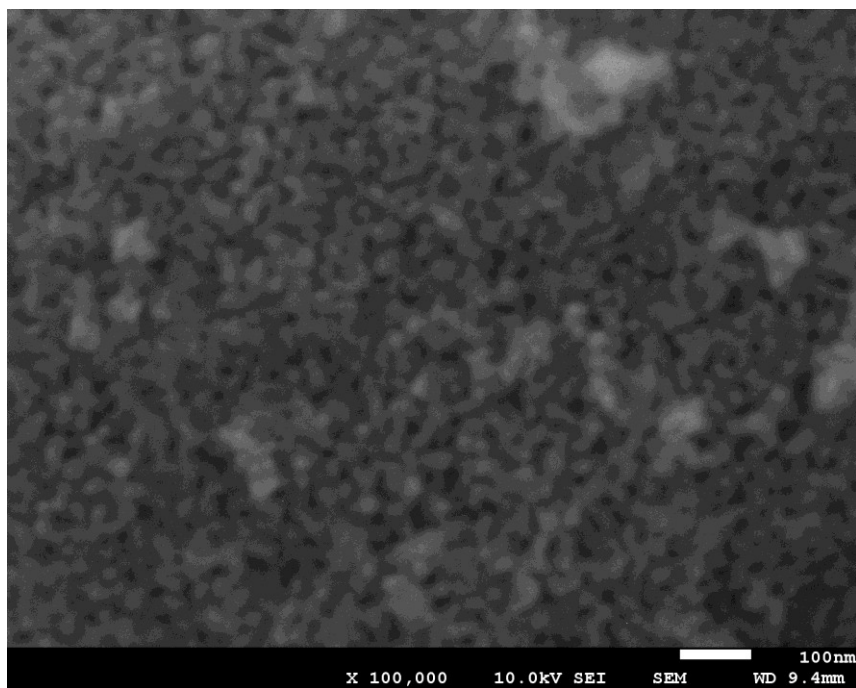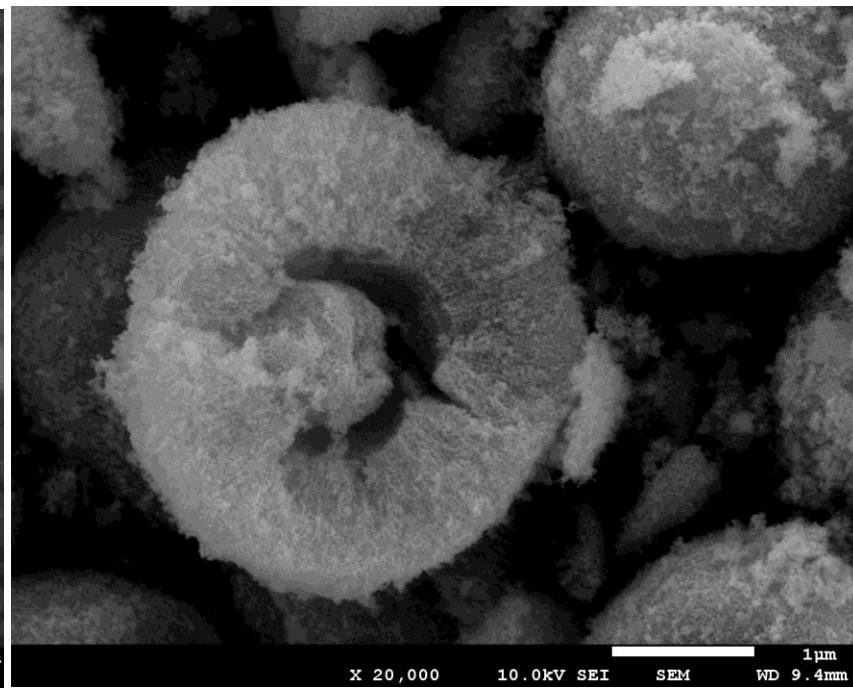



# Figure S9-(d)

# S4, from $\text{Mn}_1\text{Ca}_2(\text{CO}_3)_3$ , 400 °C-4h, HCl wash, 600 °C-3h

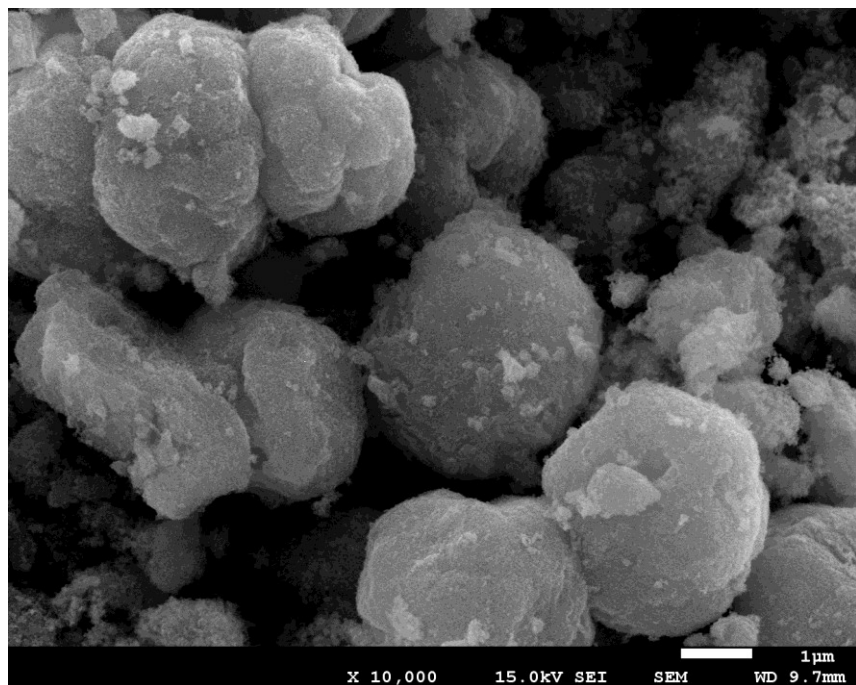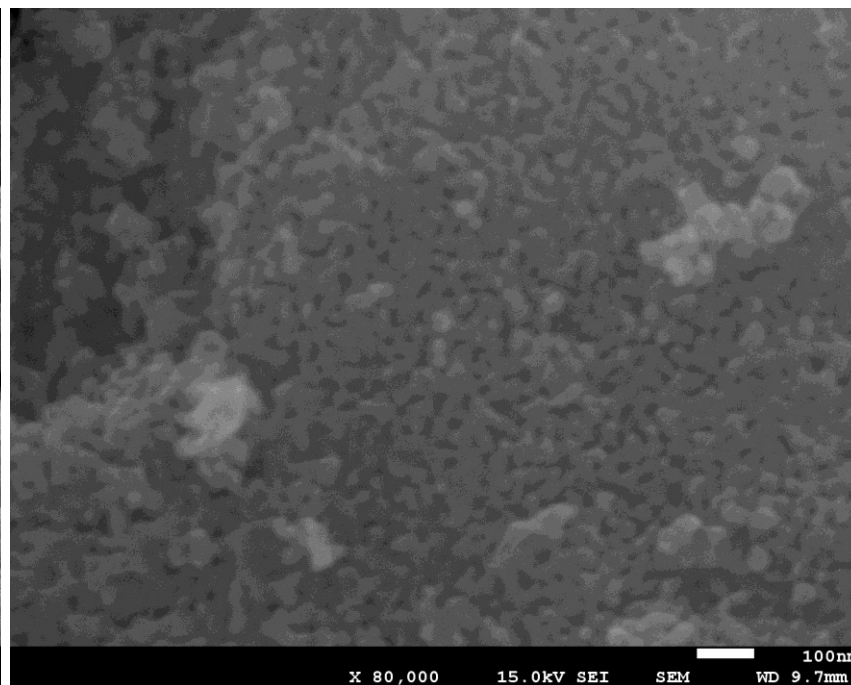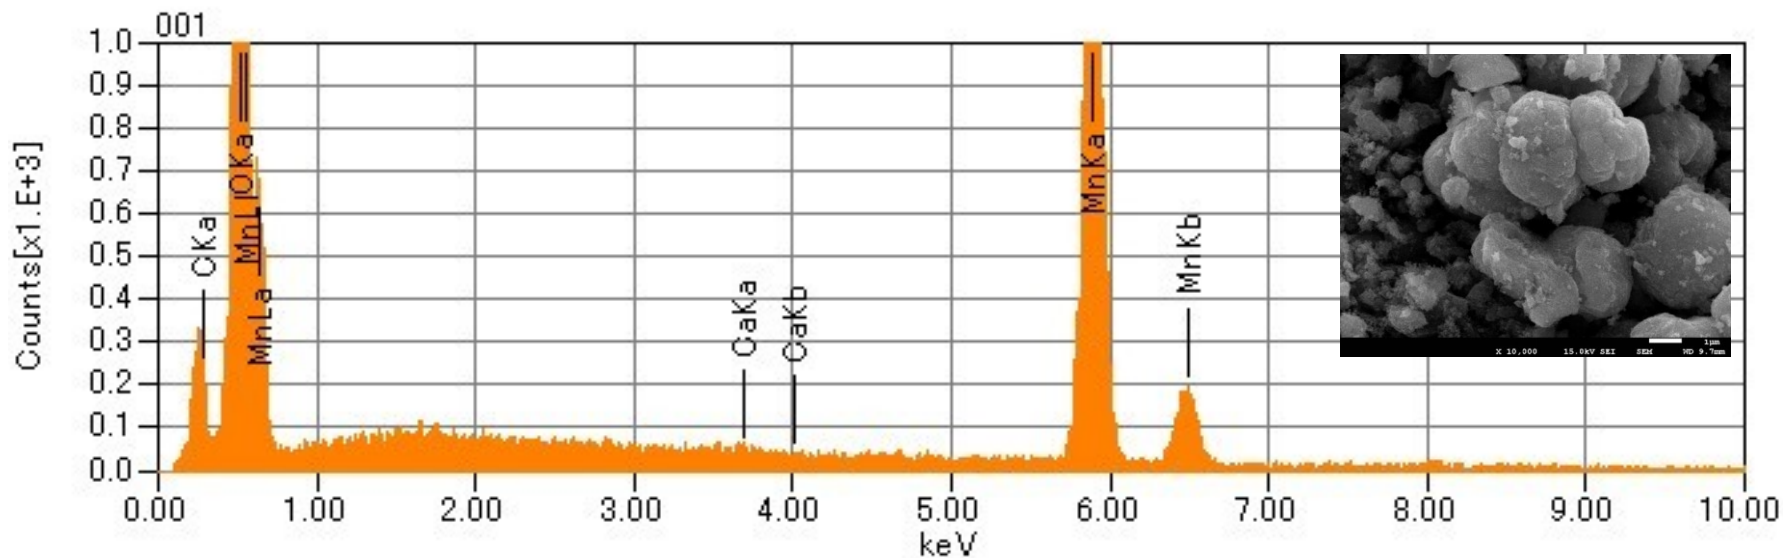

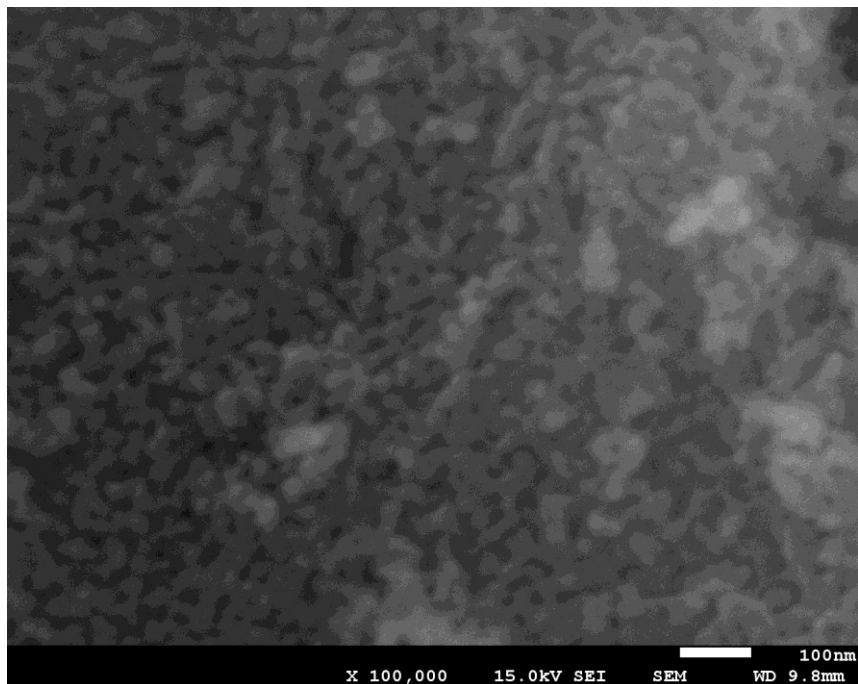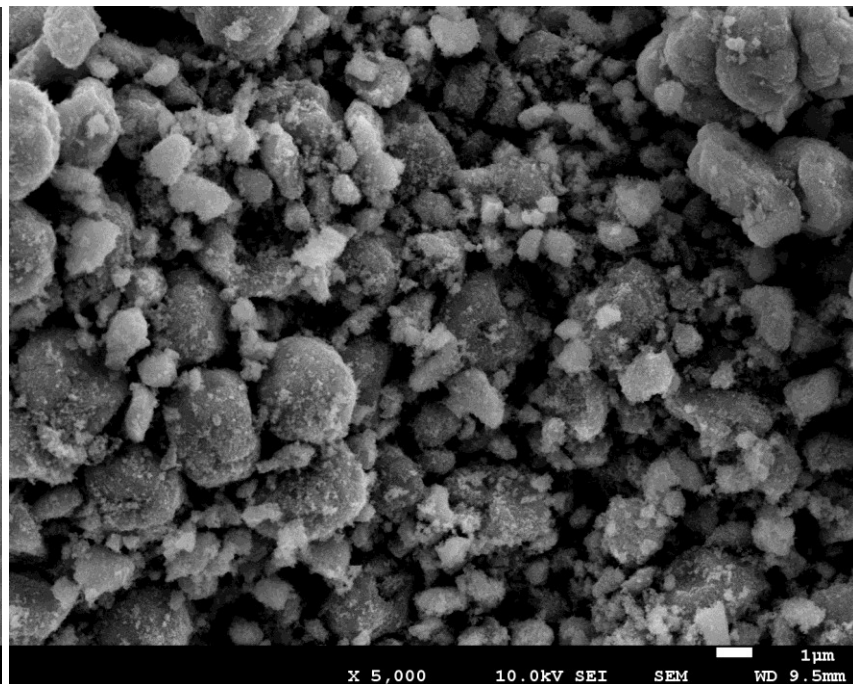

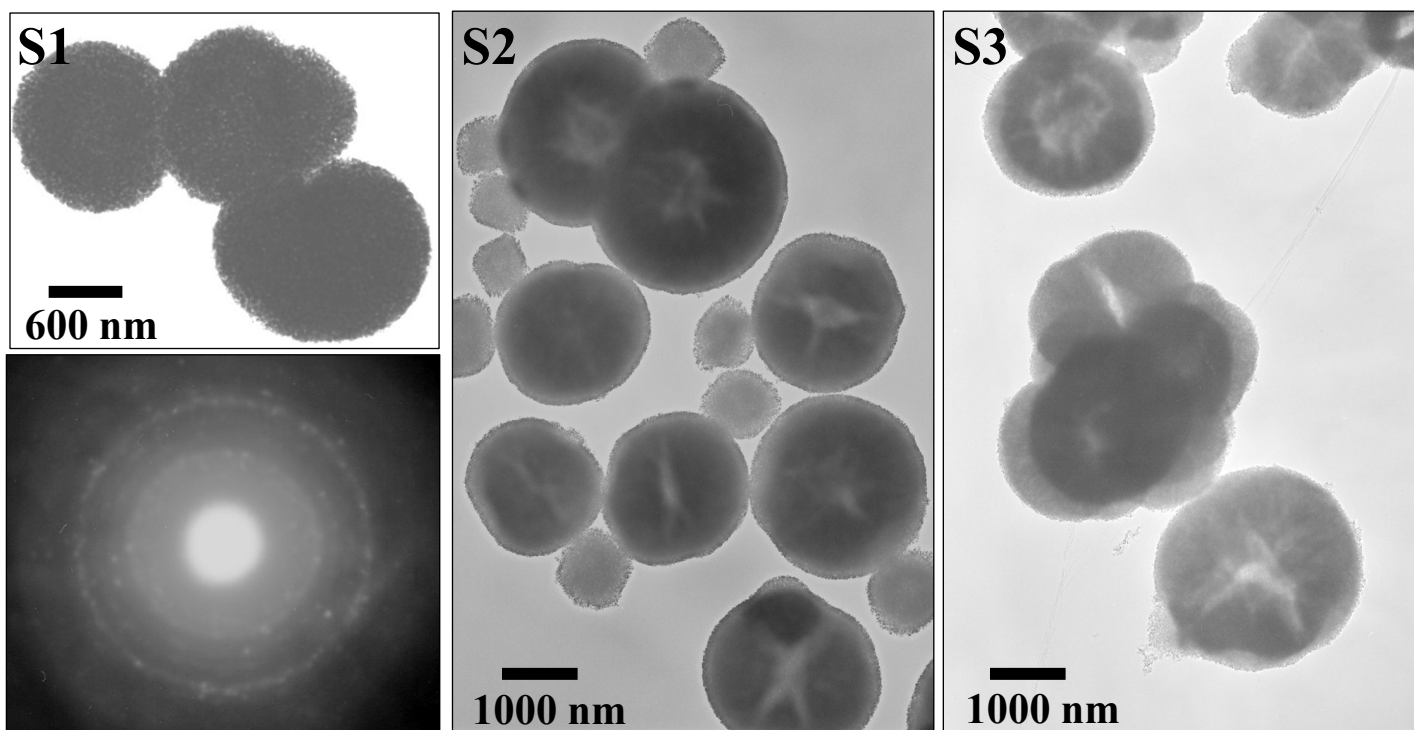

**Figure S10. TEM images for the manganese oxide ( $\text{Mn}_2\text{O}_3$ ) porous structures obtained from (a). S1, directly from  $\text{MnCO}_3$  (b). S2, from  $\text{Mn}_3\text{Ca}_1(\text{CO}_3)_4$ ; (c). S3, from  $\text{Mn}_1\text{Ca}_1(\text{CO}_3)_2$ .**



# S1

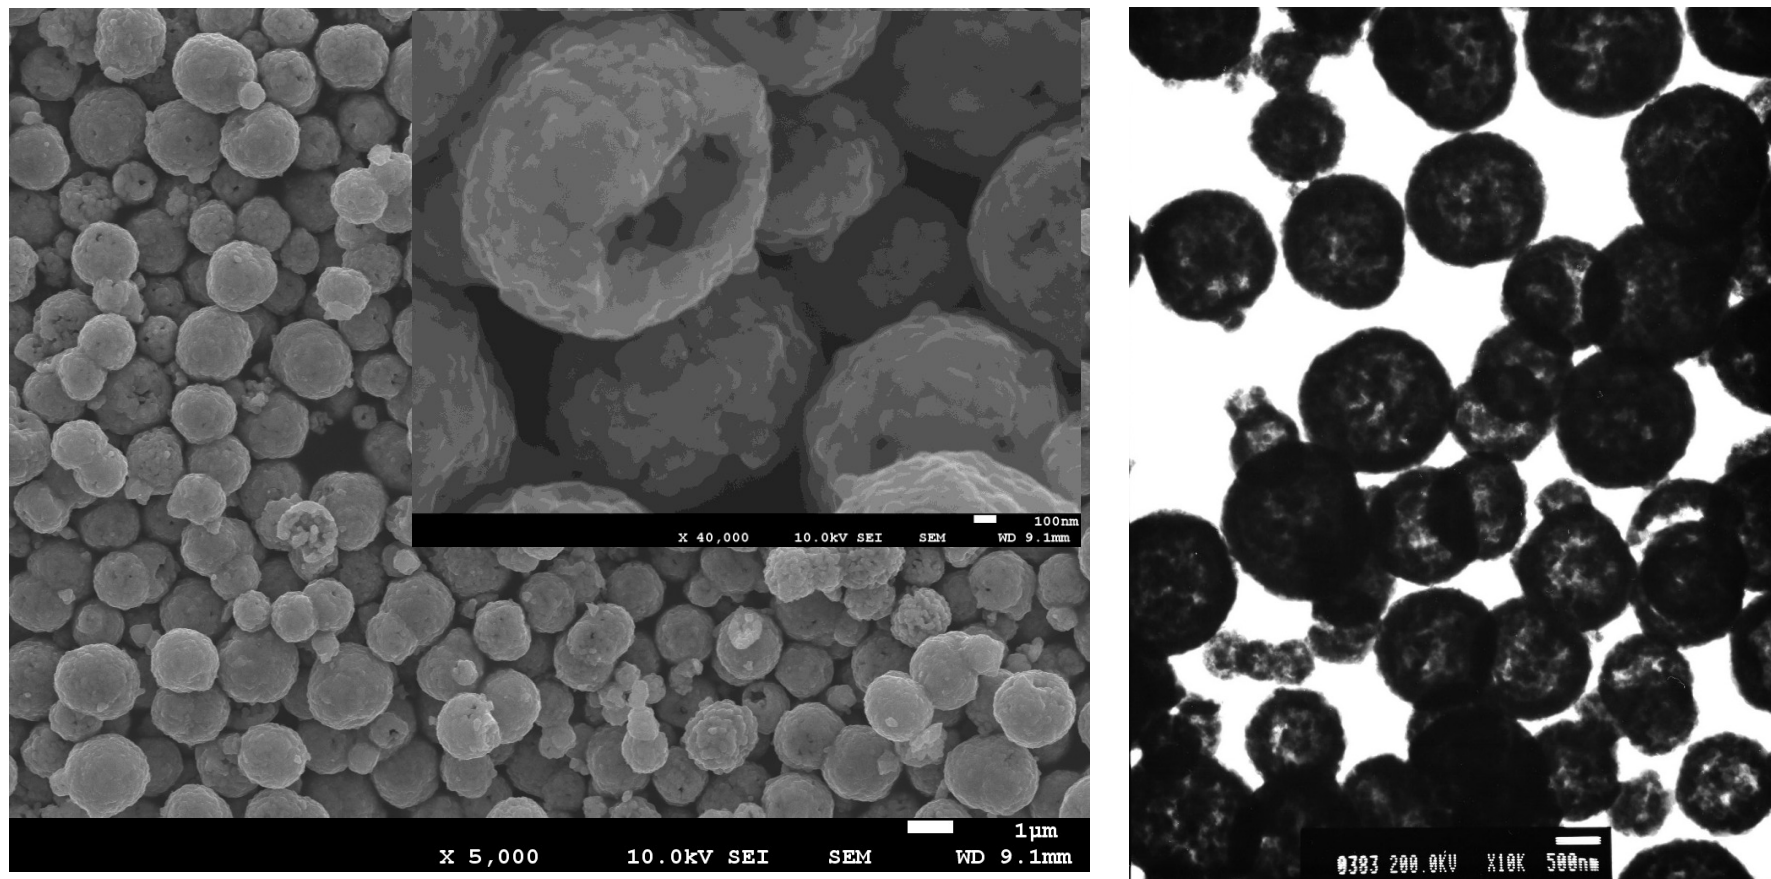

**Figure S11. SEM and TEM images for  $\text{LiMn}_2\text{O}_4$  prepared from solid-state reaction of the porous  $\text{Mn}_2\text{O}_3$  with  $\text{LiOH}\cdot\text{H}_2\text{O}$  at 750 °C for 20 h. S1, porous  $\text{Mn}_2\text{O}_3$  directly from  $\text{MnCO}_3$**



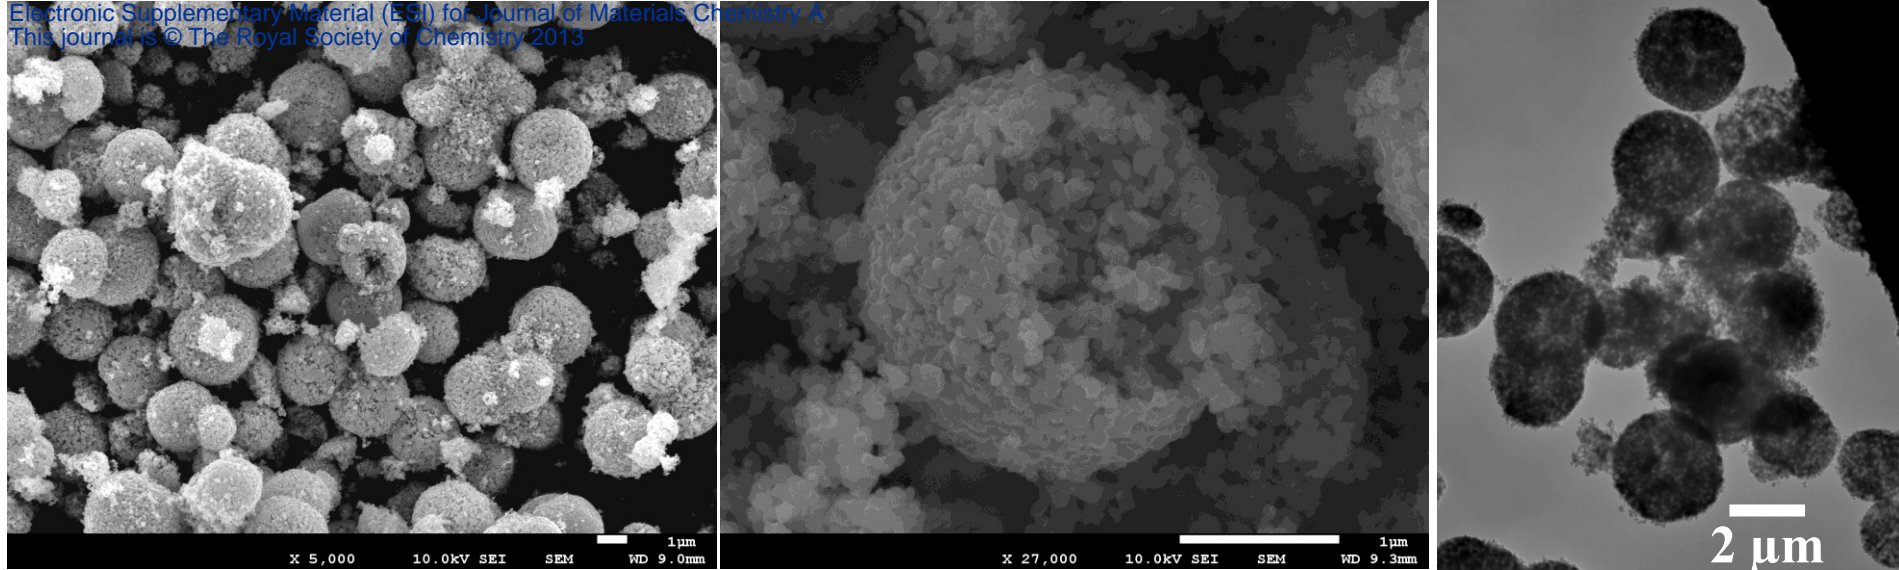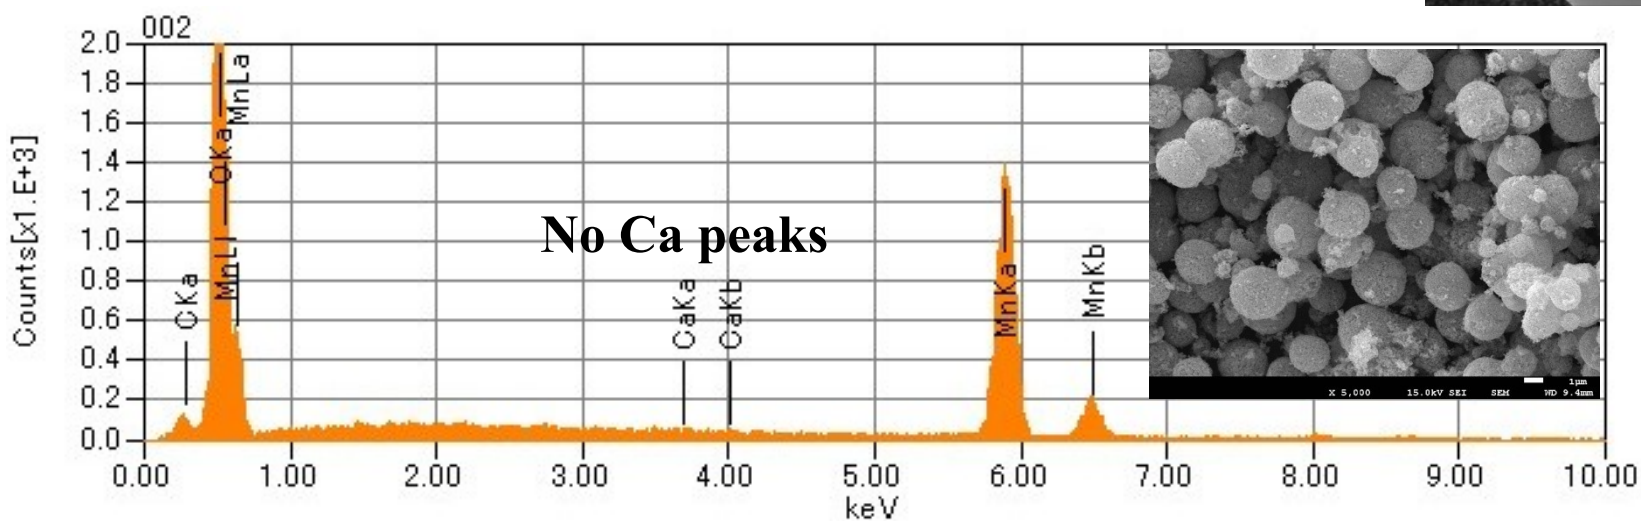

S2

**Figure S12. SEM, TEM images and EDS analysis for LiMn<sub>2</sub>O<sub>4</sub> prepared from solid-state reaction of the porous hollow Mn<sub>2</sub>O<sub>3</sub> with LiOH·H<sub>2</sub>O at 750 °C for 20 h. S2, porous Mn<sub>2</sub>O<sub>3</sub> hollow spheres from Mn<sub>3</sub>Ca<sub>1</sub>(CO<sub>3</sub>)<sub>4</sub>.**

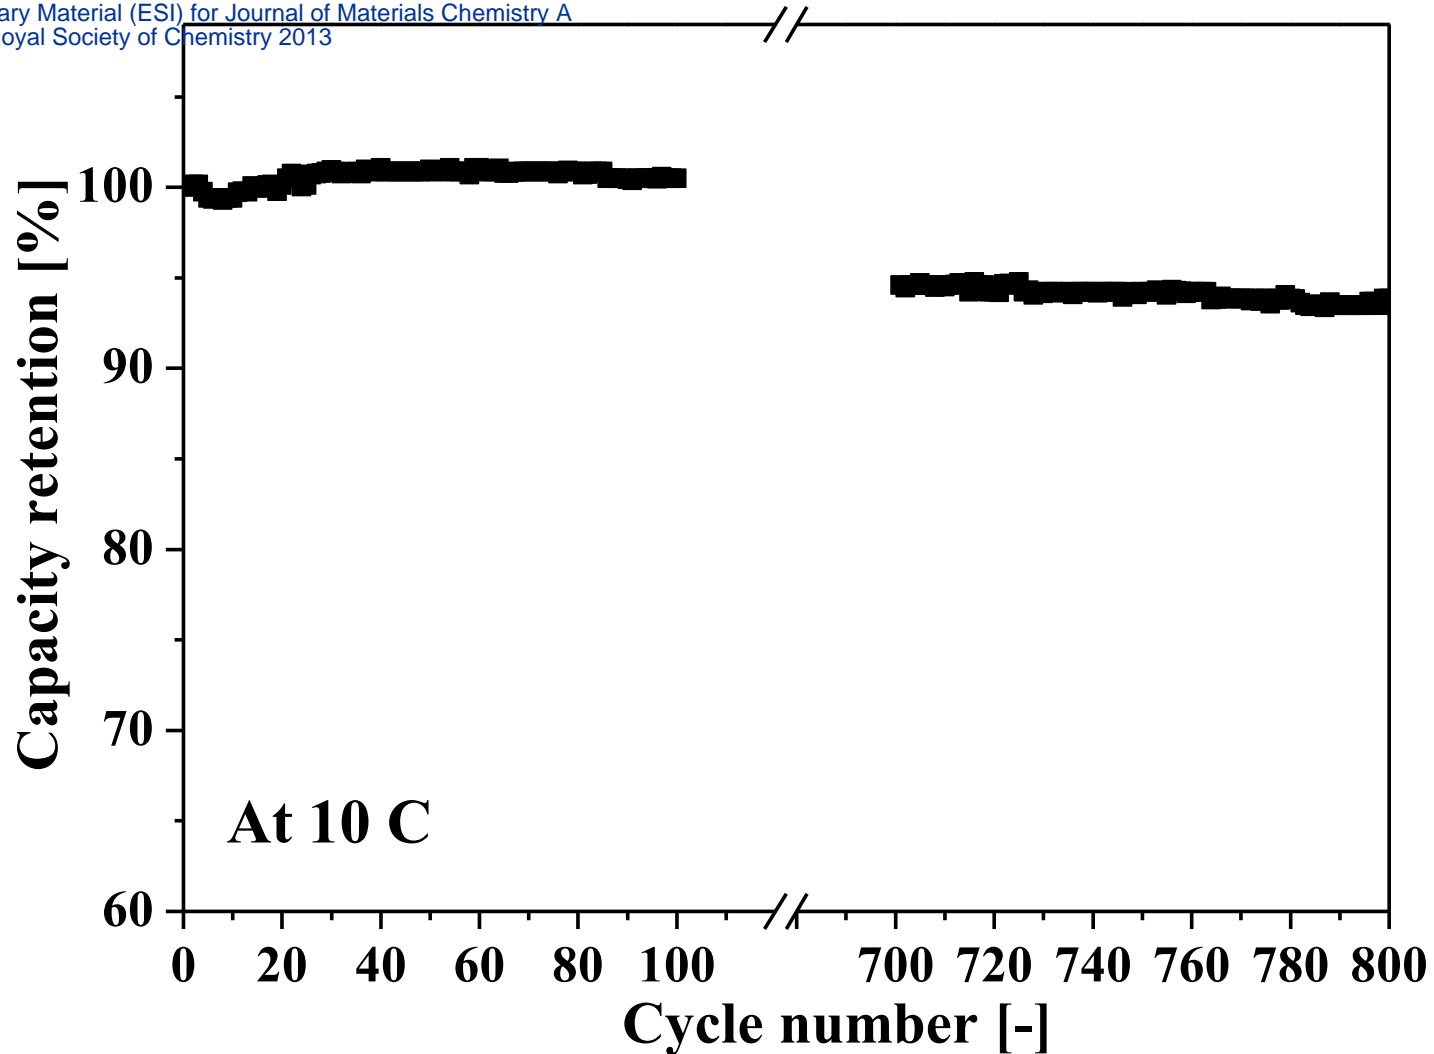

**Figure S13. Cycling performance for the porous  $\text{LiMn}_2\text{O}_4$  hollow spheres.**

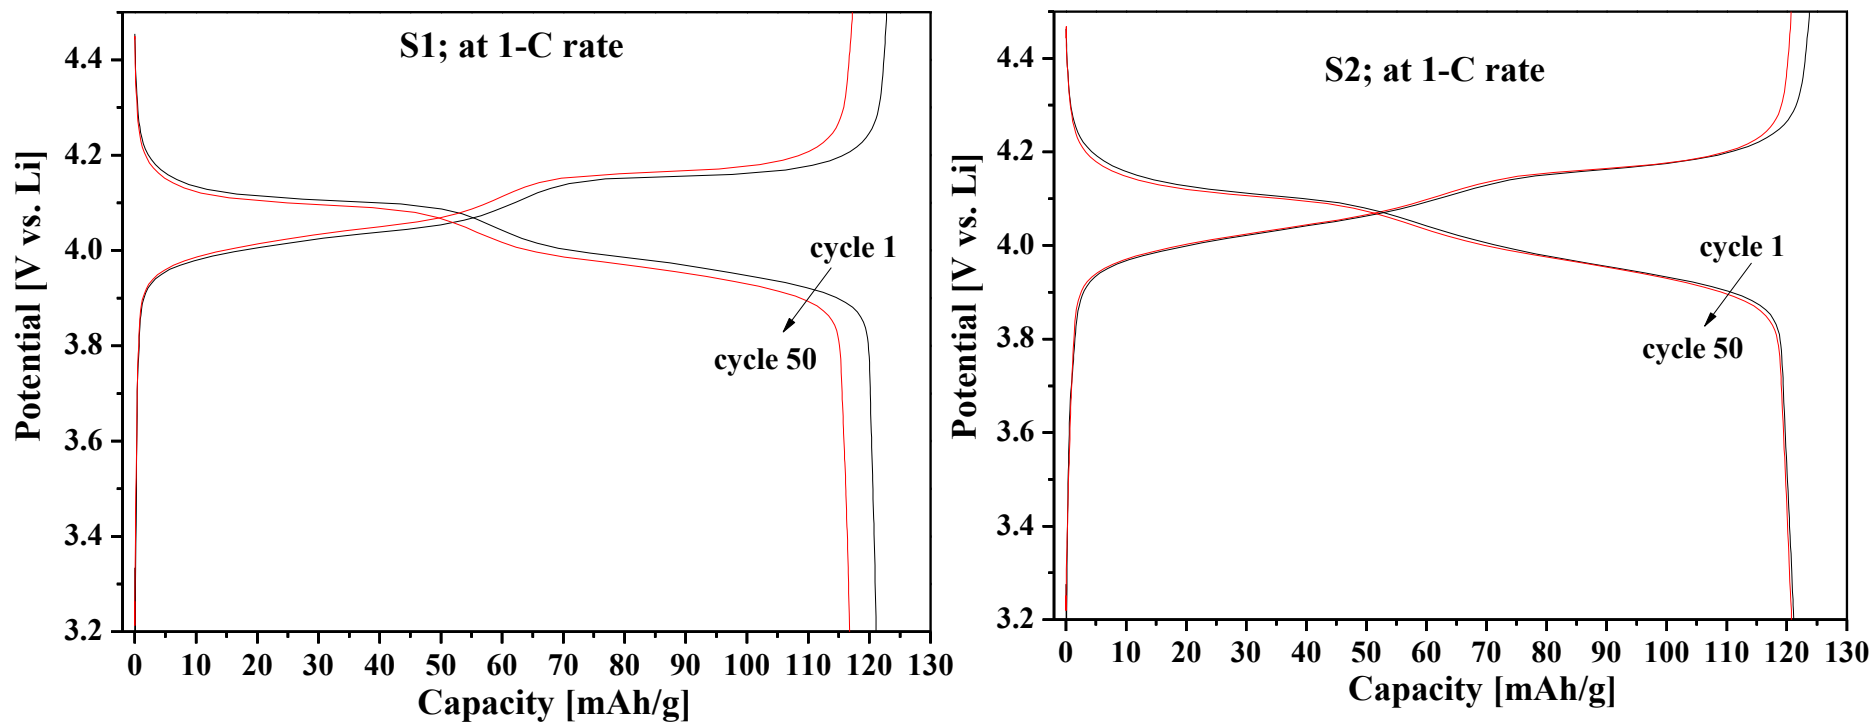

**Figure S14. Charge-discharge curves at 1-C rate.**

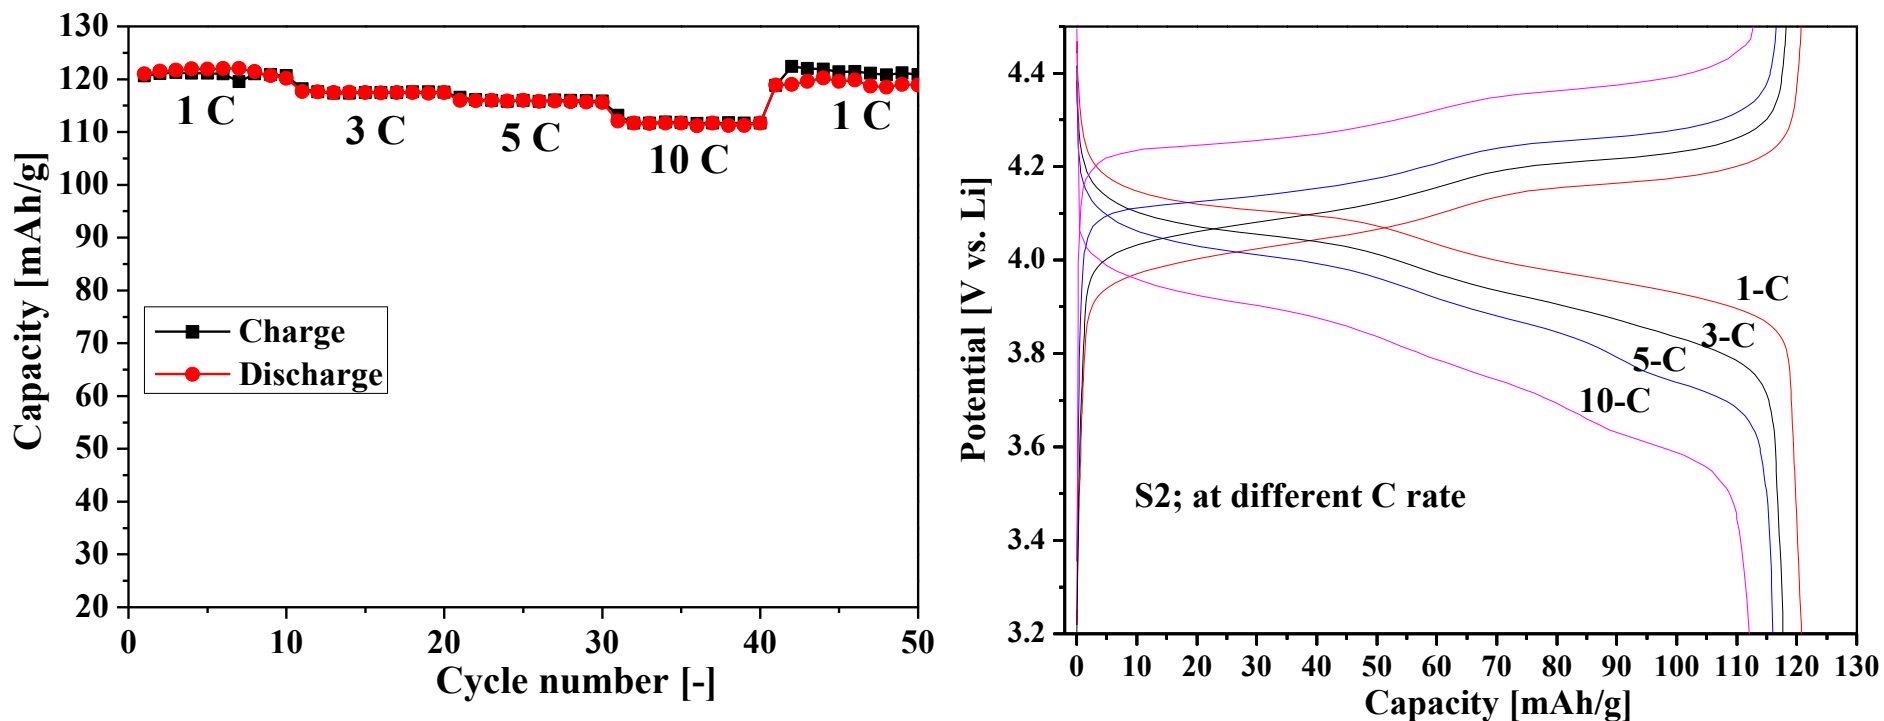

**Figure S15. Cycling performance and the charge-discharge curves for the porous  $\text{LiMn}_2\text{O}_4$  hollow spheres (S2) at different C-rates.**
